# Supplementary material for: New Steroidal Saponins from the Rhizomes of Paris vietnamensis and Their Cytotoxicity
Source: PubMed Central journal article supplement (PMC6017139; doi:10.3390/molecules23030588), 2018-03-06

## Supporting Information

### New steroidal saponins from the rhizomes of *Paris vietnamensis* and their cytotoxicity

Yang Liu<sup>1,†</sup>, Minchang Wang<sup>2,3,†</sup>, Ke Liu<sup>2,3</sup>, Pengcheng Qiu<sup>1</sup>, Shan Zhang<sup>1</sup>,  
Yunyang Lu<sup>1</sup>, Na Tang<sup>1</sup>, Haifeng Tang<sup>1,\*</sup>

<sup>1</sup> Institute of Materia Medica, School of Pharmacy, Fourth Military Medical University, Xi'an 710032, PR China; [so870823@163.com](mailto:so870823@163.com) (Y.L.); [tanghaifeng71@163.com](mailto:tanghaifeng71@163.com) (H.-F.T.)

<sup>2</sup> State Key Laboratory of Fluorine & Nitrogen Chemicals, Xi'an 710065, PR China; [wmc204@163.com](mailto:wmc204@163.com) (M.-C.W.); [happycoco5133@163.com](mailto:happycoco5133@163.com) (K. L.)

<sup>3</sup> Xi'an Modern Chemistry Research Institute, Xi'an 710065, PR China; [wmc204@163.com](mailto:wmc204@163.com) (M.-C.W.); [happycoco5133@163.com](mailto:happycoco5133@163.com) (K. L.)

\* Correspondence: [tanghaifeng71@163.com](mailto:tanghaifeng71@163.com) (H.-F.T.); Tel.: +86-29-8477-4748 (H.-F.T.)

† The authors contribute equally to this work.

## Contents

**Figure S1** Structures of compounds **1–10** from *Paris vietnamensis*

**Figure S2** Key  $^1\text{H}$ - $^1\text{H}$  COSY, HMBC and NOESY correlations of compound **2**.

**Figure S3** Key  $^1\text{H}$ - $^1\text{H}$  COSY, HMBC and NOESY correlations of compound **3**.

**Figure S4** Key  $^1\text{H}$ - $^1\text{H}$  COSY, HMBC and NOESY correlations of compound **4**

Physical and spectroscopic data of compounds **5–10**

**Table S1**  $^{13}\text{C}$ -NMR data of the aglycone moieties of compounds **5-10**

**Table S2**  $^{13}\text{C}$ -NMR data of the sugar portion of compounds **5-10**

## NMR (1D and 2D) and MS spectra of compounds 1–4

S1. Positive HR-ESI-MS spectrum of compound **1**

S2. Positive and Negative ESI-MS spectrum of compound **1**

S3.  $^1\text{H}$  NMR (800 MHz,  $\text{CD}_3\text{OD}$ ) spectrum of compound **1**

S4.  $^{13}\text{C}$  NMR (201 MHz,  $\text{CD}_3\text{OD}$ ) spectrum of compound **1**

S5. DEPT 135 spectrum of compound **1**

S6. HSQC spectrum of compound **1**

S7. HMBC spectrum of compound **1**

S8.  $^1\text{H}$ - $^1\text{H}$  COSY spectrum of compound **1**

S9. NOESY spectrum of compound **1**

S10. TOCSY spectrum of compound **1**

S11. Positive HR-ESI-MS spectrum of compound **2**

S12. Positive and Negative ESI-MS spectrum of compound **2**

S13.  $^1\text{H}$  NMR (800 MHz,  $\text{CD}_3\text{OD}$ ) spectrum of compound **2**

S14.  $^{13}\text{C}$  NMR (201 MHz,  $\text{CD}_3\text{OD}$ ) spectrum of compound **2**

S15. DEPT 135 spectrum of compound **2**

S16. HSQC spectrum of compound **2**

- S17. HMBC spectrum of compound **2**
- S18.  $^1\text{H}$ - $^1\text{H}$  COSY spectrum of compound **2**
- S19. NOESY spectrum of compound **2**
- S20. TOCSY spectrum of compound **2**
- S21. Positive HR-ESI-MS spectrum of compound **3**
- S22. Positive ESI-MS spectrum of compound **3**
- S23.  $^1\text{H}$  NMR (500 MHz,  $\text{CD}_3\text{OD}$ ) spectrum of compound **3**
- S24.  $^{13}\text{C}$  NMR (125 MHz,  $\text{CD}_3\text{OD}$ ) spectrum of compound **3**
- S25. DEPT 135 spectrum of compound **3**
- S26. HSQC spectrum of compound **3**
- S27. HMBC spectrum of compound **3**
- S28.  $^1\text{H}$ - $^1\text{H}$  COSY spectrum of compound **3**
- S29. NOESY spectrum of compound **3**
- S30. TOCSY spectrum of compound **3**
- S31. Positive HR-ESI-MS spectrum of compound **4**
- S32.  $^1\text{H}$  NMR (500 MHz,  $\text{CD}_3\text{OD}$ ) spectrum of compound **4**
- S33.  $^{13}\text{C}$  NMR (125 MHz,  $\text{CD}_3\text{OD}$ ) spectrum of compound **4**
- S34. DEPT 135 spectrum of compound **4**
- S35. HSQC spectrum of compound **4**
- S36. HMBC spectrum of compound **4**
- S37.  $^1\text{H}$ - $^1\text{H}$  COSY spectrum of compound **4**
- S38. NOESY spectrum of compound **4**
- S39. TOCSY spectrum of compound **4**

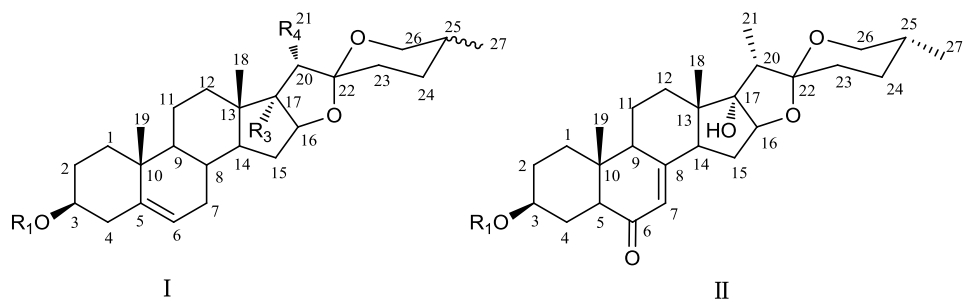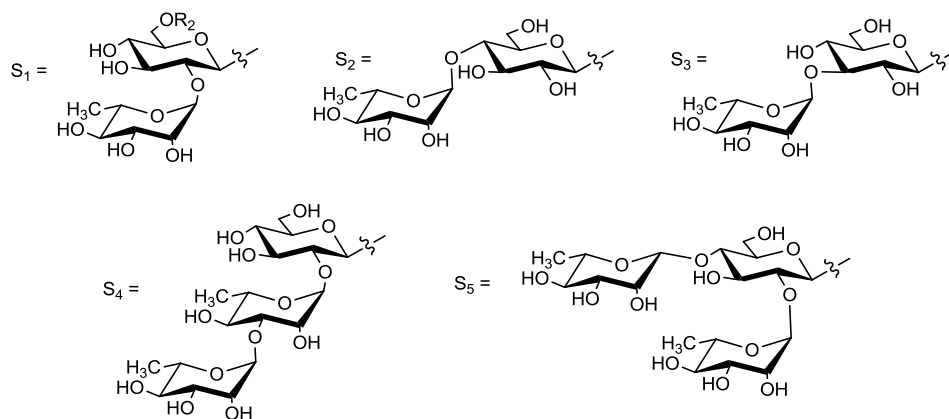

|           | Aglycone | R <sub>1</sub> | R <sub>2</sub>    | R <sub>3</sub> | R <sub>4</sub>     | Configuration of C-25 |
|-----------|----------|----------------|-------------------|----------------|--------------------|-----------------------|
| <b>1</b>  | I        | S <sub>1</sub> | COCH <sub>3</sub> | OH             | CH <sub>3</sub>    | 25R                   |
| <b>2</b>  | I        | S <sub>1</sub> | H                 | OH             | CH <sub>2</sub> OH | 25R                   |
| <b>3</b>  | II       | S <sub>1</sub> | H                 | -              | -                  | 25R                   |
| <b>4</b>  | II       | S <sub>2</sub> | H                 | -              | -                  | 25R                   |
| <b>5</b>  | I        | S <sub>1</sub> | H                 | OH             | CH <sub>3</sub>    | 25R                   |
| <b>6</b>  | I        | S <sub>1</sub> | H                 | OH             | CH <sub>3</sub>    | 25S                   |
| <b>7</b>  | I        | S <sub>3</sub> | H                 | OH             | CH <sub>3</sub>    | 25R                   |
| <b>8</b>  | I        | S <sub>4</sub> | H                 | H              | CH <sub>3</sub>    | 25R                   |
| <b>9</b>  | I        | S <sub>5</sub> | H                 | OH             | CH <sub>3</sub>    | 25R                   |
| <b>10</b> | I        | S <sub>1</sub> | H                 | H              | CH <sub>3</sub>    | 25R                   |

**Figure S1** Structures of compounds **1–10** from *Paris vietnamensis*

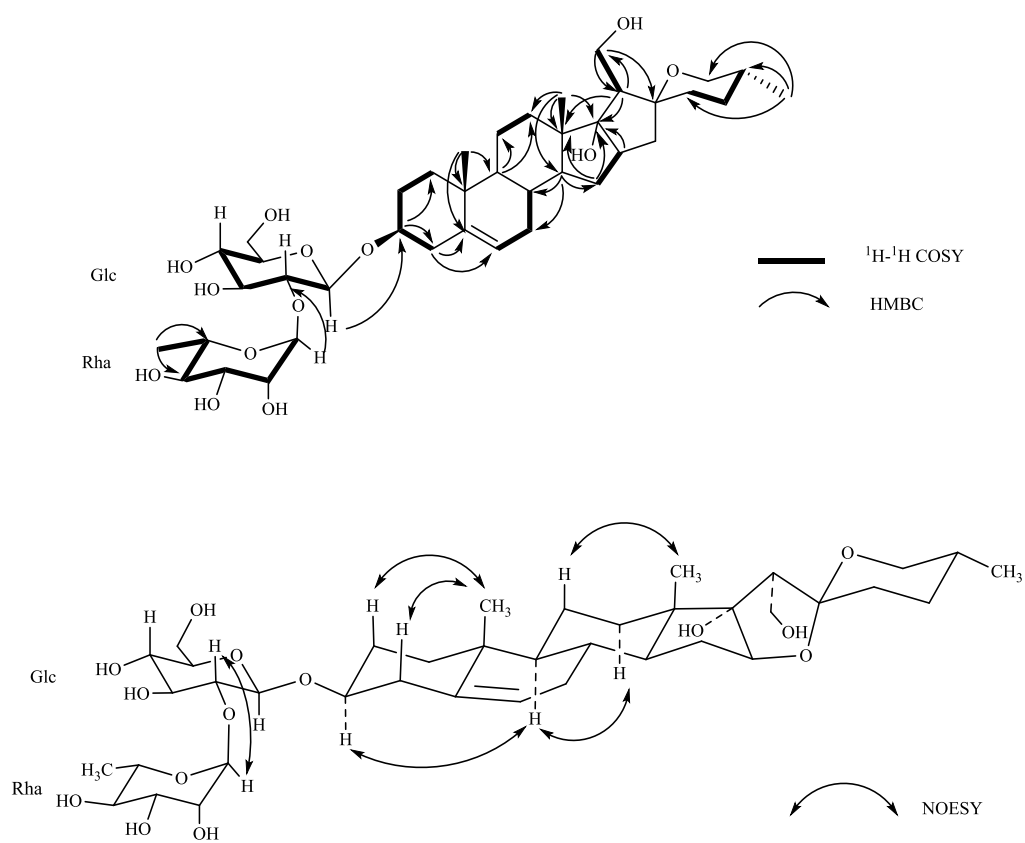

Figure S2 Key <sup>1</sup>H-<sup>1</sup>H COSY, HMBC and NOESY correlations of compound 2

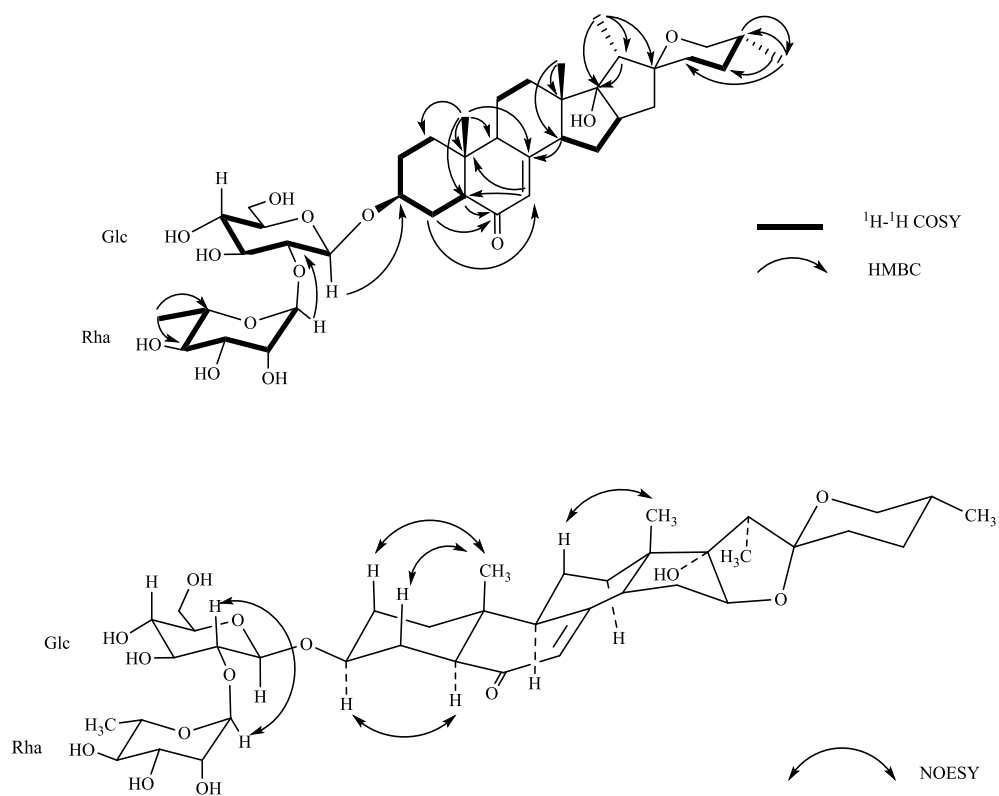

Figure S3 Key <sup>1</sup>H-<sup>1</sup>H COSY, HMBC and NOESY correlations of compound 3

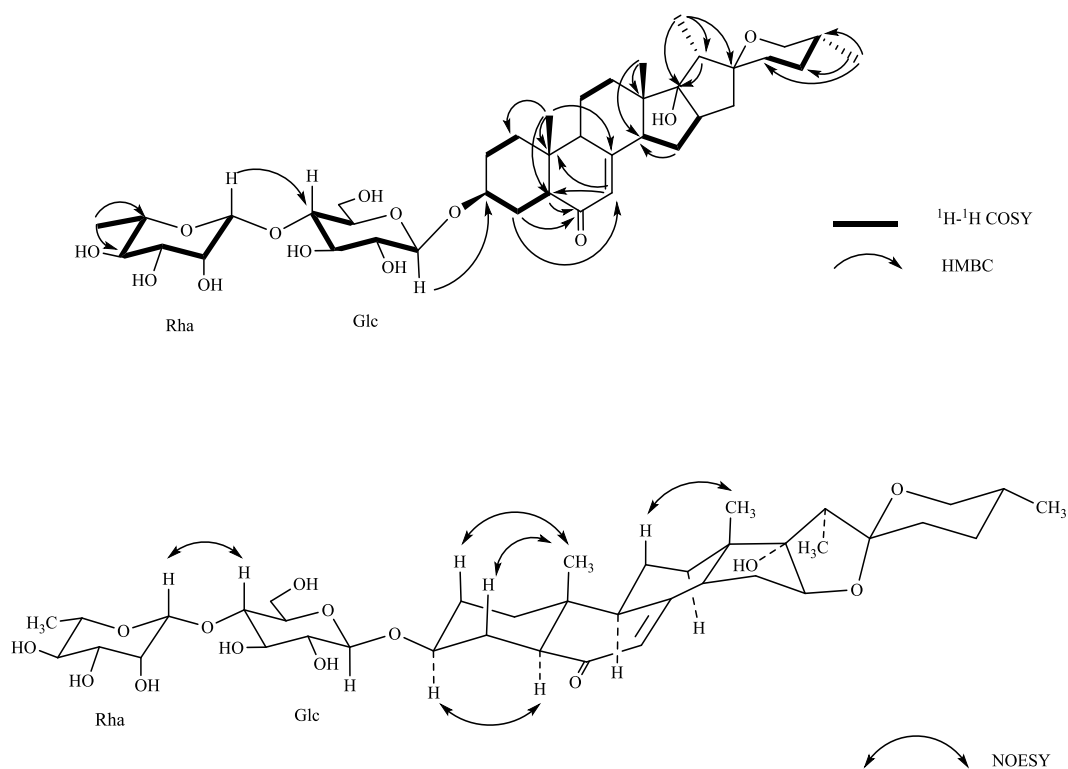

Figure S4 Key  $^1\text{H}$ - $^1\text{H}$  COSY, HMBC and NOESY correlations of compound 4

### Physical and spectroscopic data of compounds 5–10

**Compound 5:** White amorphous powder;  $^1\text{H}$ -NMR (500MHz,  $\text{CD}_3\text{OD}$ )  $\delta_{\text{H}}$ : 0.83 (3H, *s*, H-18), 1.05 (3H, *s*, H-19), 0.89 (3H, *d*,  $J = 6.4$  Hz, H-21), 0.80 (3H, *d*,  $J = 7.2$  Hz, H-27), 5.39 (1H, *br s*, H-6), 1.26 (3H, *d*,  $J = 6.24$  Hz, Me of Rha I), 4.48 (1H, *d*,  $J = 7.76$  Hz, Glc H-1), 5.20 (1H, *br s*, Rha H-1);  $^{13}\text{C}$ -NMR data, see **Table S1** and **Table S2**; ESI-MS (negative ion mode) 737  $[\text{M} - \text{H}]^-$ . Compared to the physical and spectroscopic data with literature values, compound 5 was identified as 25(*R*)-spirost-5-en-3 $\beta$ ,17 $\alpha$ -diol-3-*O*- $\alpha$ -L-rhamnopyranosyl-2- $\beta$ -D-glucopyranoside [1].

**Compound 6:** White amorphous powder;  $^1\text{H}$ -NMR (500MHz,  $\text{CD}_3\text{OD}$ )  $\delta_{\text{H}}$ : 0.89 (3H, *s*, H-18), 1.06 (3H, *s*, H-19), 0.93 (3H, *d*,  $J = 7.44$  Hz, H-21), 1.09 (3H, *d*,  $J = 7.12$  Hz, H-27), 5.39 (1H, *br s*, H-6), 1.24 (3H, *d*,  $J = 6.24$  Hz, Me of Rha I), 4.48 (1H, *d*,  $J = 7.76$  Hz, Glc

H-1), 5.19 (1H, *br s*, Rha H-1); <sup>13</sup>C-NMR data, see **Table S1** and **Table S2**; ESI-MS (negative ion mode) 737 [M – H]<sup>–</sup>. Compared to the physical and spectroscopic data with literature values, compound **6** was identified as 25(*S*)-spirost-5-en-3β,17α-diol-3-*O*-α-*L*-rhamnopyranosyl-(1 → 2)-β-*D*-glucopyranoside [2].

*Compound 7*: White amorphous powder; <sup>1</sup>H-NMR (500MHz, CD<sub>3</sub>OD) δ<sub>H</sub>: 0.83 (3H, *s*, H-18), 1.05 (3H, *s*, H-19), 0.89 (3H, *d*, *J* = 7.2 Hz, H-21), 0.80 (3H, *d*, *J* = 6.4 Hz, H-27), 5.39 (1H, *br s*, H-6), 1.24 (3H, *d*, *J* = 6.24 Hz, Me of Rha I), 4.48 (1H, *d*, *J* = 7.84 Hz, Glc H-1), 5.19 (1H, *br s*, Rha H-1); <sup>13</sup>C-NMR data, see **Table S1** and **Table S2**; ESI-MS (negative ion mode) 737 [M – H]<sup>–</sup>. Compared to the physical and spectroscopic data with literature values, compound **7** was identified as 25(*R*)-spirost-5-en-3β,17α-diol-3-*O*-α-*L*-rhamnopyranosyl-(1 → 3)-β-*D*-glucopyranoside [3].

*Compound 8*: White amorphous powder; <sup>1</sup>H-NMR (500MHz, CD<sub>3</sub>OD) δ<sub>H</sub>: 0.82 (3H, *s*, H-18), 1.07 (3H, *s*, H-19), 0.98 (3H, *d*, *J* = 7.0 Hz, H-21), 0.81 (3H, *d*, *J* = 6.4 Hz, H-27), 5.40 (1H, *br s*, H-6), 1.27 (3H, *d*, *J* = 6.25 Hz, Me of Rha I), 1.26 (3H, *d*, *J* = 6.25 Hz, Me of Rha II), 4.51 (1H, *d*, *J* = 7.8 Hz, Glc H-1), 5.22 (1H, *br s*, Rha I H-1), 4.85 (1H, *br s*, Rha II H-1); <sup>13</sup>C-NMR data, see **Table S1** and **Table S2**; ESI-MS (negative ion mode) 867 [M – H]<sup>–</sup>. Compared to the physical and spectroscopic data with literature values, compound **8** was identified as 25(*R*)-diosgenin-3-*O*-α-*L*-rhamnopyranosyl-(1 → 2)-α-*L*-rhamnopyranosyl-(1 → 3)-β-*D*-glucopyranoside [4].

*Compound 9*: White amorphous powder; <sup>1</sup>H-NMR (500MHz, CD<sub>3</sub>OD) δ<sub>H</sub>: 0.84 (3H, *s*,

H-18), 1.06 (3H, *s*, Me-19), 0.90 (3H, *d*,  $J = 7.25$  Hz, H-21), 0.80 (3H, *d*,  $J = 6.3$  Hz, H-27), 5.40 (1H, *br s*, H-6), 1.25 (3H, *d*,  $J = 6.25$  Hz, Me of Rha I), 1.27 (3H, *d*,  $J = 6.25$  Hz, Me of Rha II), 4.51 (1H, *d*,  $J = 7.85$  Hz, Glc H-1), 5.21 (1H, *br s*, Rha I H-1), 4.85 (1H, *br s*, Rha II H-1);  $^{13}\text{C}$ -NMR data, see **Table S1** and **Table S2**; ESI-MS (negative ion mode) 883  $[\text{M} - \text{H}]^-$ . Compared to the physical and spectroscopic data with literature values, compound **9** was identified as 25(*R*)-spirost-5-en-3 $\beta$ ,17 $\alpha$ -diol-3-*O*- $\alpha$ -L-rhamnopyranosyl-(1  $\rightarrow$  4)-[ $\alpha$ -L-rhamnopyranosyl-(1 $\rightarrow$ 2)]- $\beta$ -D-glucopyranoside [5].

*Compound 10*: White amorphous powder;  $^1\text{H}$ -NMR (500MHz,  $\text{CD}_3\text{OD}$ )  $\delta_{\text{H}}$ : 0.81 (3H, *s*, H-18), 1.05 (3H, *s*, Me-19), 0.96 (3H, *d*,  $J = 7.0$  Hz, H-21), 0.79 (3H, *d*,  $J = 6.4$  Hz, H-27), 5.38 (1H, *br s*, H-6), 1.24 (3H, *d*,  $J = 6.25$  Hz, Me of Rha), 4.48 (1H, *d*,  $J = 7.75$  Hz, Glc H-1), 5.19 (1H, *br s*, Rha H-1);  $^{13}\text{C}$ -NMR data, see **Table S1** and **Table S2**; ESI-MS (negative ion mode) 721  $[\text{M} - \text{H}]^-$ . Compared to the physical and spectroscopic data with literature values, compound **10** was identified as 25(*R*)-diosgenin-3-*O*- $\alpha$ -L-rhamnopyranosyl-(1 $\rightarrow$ 2)- $\beta$ -D- glucopyranoside [6].

**Table S1**  $^{13}\text{C}$ -NMR data of the aglycone moieties of compounds 5-10

| Position | Compounds |          |          |          |          |           |
|----------|-----------|----------|----------|----------|----------|-----------|
|          | <b>5</b>  | <b>6</b> | <b>7</b> | <b>8</b> | <b>9</b> | <b>10</b> |
| 1        | 38.74     | 38.74    | 38.74    | 38.70    | 38.72    | 38.70     |
| 2        | 30.91     | 30.90    | 30.91    | .0.89    | 30.87    | 30.89     |



|    |        |        |        |        |        |        |
|----|--------|--------|--------|--------|--------|--------|
| 3  | 79.32  | 79.33  | 79.32  | 79.43  | 79.39  | 79.35  |
| 4  | 39.66  | 39.66  | 39.66  | 39.65  | 39.63  | 39.66  |
| 5  | 142.05 | 142.06 | 142.05 | 142.04 | 141.99 | 142.07 |
| 6  | 122.75 | 122.72 | 122.75 | 122.78 | 122.78 | 122.74 |
| 7  | 32.66  | 33.36  | 32.66  | 32.88  | 32.64  | 32.89  |
| 8  | 33.44  | 33.38  | 33.44  | 32.93  | 33.41  | 32.93  |
| 9  | 51.64  | 51.62  | 51.63  | 51.84  | 51.59  | 51.85  |
| 10 | 38.15  | 38.15  | 38.15  | 38.19  | 38.12  | 38.19  |
| 11 | 21.84  | 21.91  | 21.84  | 22.12  | 21.84  | 22.13  |
| 12 | 33.01  | 33.38  | 33.00  | 41.08  | 32.98  | 41.08  |
| 13 | 46.00  | 46.49  | 46.00  | 41.57  | 45.97  | 41.56  |
| 14 | 54.08  | 53.36  | 54.07  | 57.95  | 54.05  | 57.95  |
| 15 | 32.25  | 32.94  | 32.25  | 33.32  | 32.24  | 33.35  |
| 16 | 90.69  | 89.78  | 90.69  | 82.35  | 90.68  | 82.36  |
| 17 | 91.45  | 90.06  | 91.45  | 63.89  | 91.43  | 63.88  |
| 18 | 17.67  | 18.01  | 17.67  | 16.69  | 17.69  | 16.92  |
| 19 | 19.99  | 19.98  | 19.99  | 19.99  | 19.99  | 19.99  |
| 20 | 45.68  | 46.75  | 45.68  | 43.06  | 45.66  | 43.05  |
| 21 | 9.25   | 10.06  | 9.25   | 15.01  | 9.27   | 15.03  |
| 22 | 111.10 | 112.31 | 111.10 | 110.73 | 111.09 | 110.73 |
| 23 | 33.37  | 22.49  | 33.37  | 32.57  | 33.36  | 32.57  |
| 24 | 29.59  | 25.33  | 29.59  | 30.03  | 29.57  | 30.03  |
| 25 | 31.44  | 28.58  | 31.44  | 31.58  | 31.42  | 31.59  |
| 26 | 67.86  | 69.56  | 67.86  | 68.00  | 67.84  | 68.00  |
| 27 | 17.64  | 16.67  | 17.64  | 17.64  | 17.65  | 17.64  |

**Table S2**  $^{13}\text{C}$ -NMR data of the sugar portion of compounds 5-10

| Sugar<br>portion | Compounds |        |        |        |        |        |        |
|------------------|-----------|--------|--------|--------|--------|--------|--------|
|                  | 5         | 6      | 7      | 8      | 9      | 10     |        |
| Glc              | 1         | 100.66 | 100.67 | 100.66 | 100.60 | 100.56 | 100.68 |

|        |   |        |        |        |        |        |        |
|--------|---|--------|--------|--------|--------|--------|--------|
|        | 2 | 79.18  | 79.18  | 79.54  | 79.45  | 79.46  | 79.18  |
|        | 3 | 77.89  | 79.53  | 79.18  | 80.13  | 76.70  | 77.86  |
|        | 4 | 79.54  | 77.88  | 77.89  | 76.72  | 80.06  | 79.52  |
|        | 5 | 71.99  | 72.00  | 71.99  | 78.18  | 78.15  | 71.98  |
|        | 6 | 62.91  | 62.91  | 62.91  | 62.09  | 62.07  | 62.91  |
| Rha I  | 1 | 102.33 | 102.31 | 102.33 | 102.43 | 102.43 | 102.31 |
|        | 2 | 72.38  | 72.37  | 72.38  | 72.33  | 72.30  | 72.36  |
|        | 3 | 72.53  | 72.54  | 72.53  | 79.42  | 72.49  | 72.53  |
|        | 4 | 74.09  | 74.10  | 74.09  | 73.87  | 74.04  | 74.07  |
|        | 5 | 69.90  | 69.90  | 69.90  | 69.91  | 69.91  | 69.89  |
|        | 6 | 18.11  | 18.11  | 18.11  | 18.13  | 18.02  | 18.11  |
| Rha II | 1 |        |        |        | 103.15 | 103.13 |        |
|        | 2 |        |        |        | 74.07  | 72.57  |        |
|        | 3 |        |        |        | 72.59  | 72.30  |        |
|        | 4 |        |        |        | 72.51  | 73.85  |        |
|        | 5 |        |        |        | 70.82  | 70.79  |        |
|        | 6 |        |        |        | 18.01  | 18.12  |        |

## Reference

1. Xie, B.B; Liu, H.Y; Ni, W; Chen, C.X. Ypsilandrosides C-G, five new spirostanol saponins from *Ypsilandra thibetica*. *Steroids* **2009**, *12*, 950-955.
2. Kang, L.P; Huang, Y.Y; Zhan, Z.L; Liu, D.H; Peng, H.S; Nan, T.G; Zhang, Y; Hao, Q.X; Tang, J.F; Zhu, S.D; et al. Structural characterization and discrimination of the *Paris polyphylla* var. *yunnanensis* and *Paris vietnamensis* based on metabolite profiling analysis. *Journal of Pharmaceutical and Biomedical Analysis* **2017**, *142*, 252-261.
3. Tang, L.Y; Wang, Z.J; Wu, H.W; Yokosuka, A; Mimaki, Y. Steroidal glycosides from the underground parts of *Dracaena thalioides* and their cytotoxic activity. *Phytochemistry* **2014**, *107*, 102-110.
4. Khodakov, G.V; Akimov, Y.A; Shashkov, A.S; Kintia, P.K; Grishkovets, V.I. Triterpene and steroid saponins isolated from two *Melilotus* species. *Oxygen*

*Transport to Tissue XXXIII* **1996**, 405,: 211-222.

5. Li, Y.H; Liu, C.X; Xiao, D; Han, J; Yue, Z.G; Sun, Y; Fan, L; Zhang, F; Meng, J; Zhang, R; et al. *Trillium tschonoskii* steroidal saponins suppress the growth of colorectal Cancer cells in vitro and in vivo. *Journal of Ethnopharmacology* **2015**, 168, 136-145.
6. Lee, H.J; Watanabe, B; Nakayasu, M; Onjo, M; Sugimoto, Y; Mizutani, M. Novel steroidal saponins from *Dioscorea esculenta* (Togedokoro). *Bioscience, Biotechnology, and Biochemistry* **2017**, 81, 2253-2260.

#### S1. Positive HR-ESI-MS spectrum of compound **1**

| Mass     | Calc. Mass | mDa  | PPM  | DBE | i-FIT | Formula                                            |
|----------|------------|------|------|-----|-------|----------------------------------------------------|
| 803.4170 | 803.4194   | -2.4 | -3.0 | 9.5 | 212.5 | C <sub>41</sub> H <sub>64</sub> O <sub>14</sub> Na |

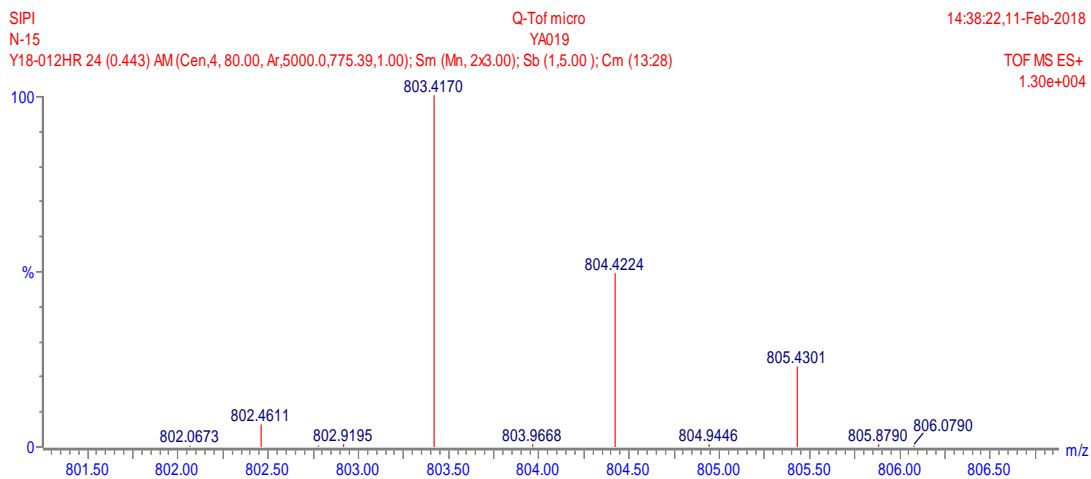

## S2. Positive and Negative ESI-MS spectrum of compound 1

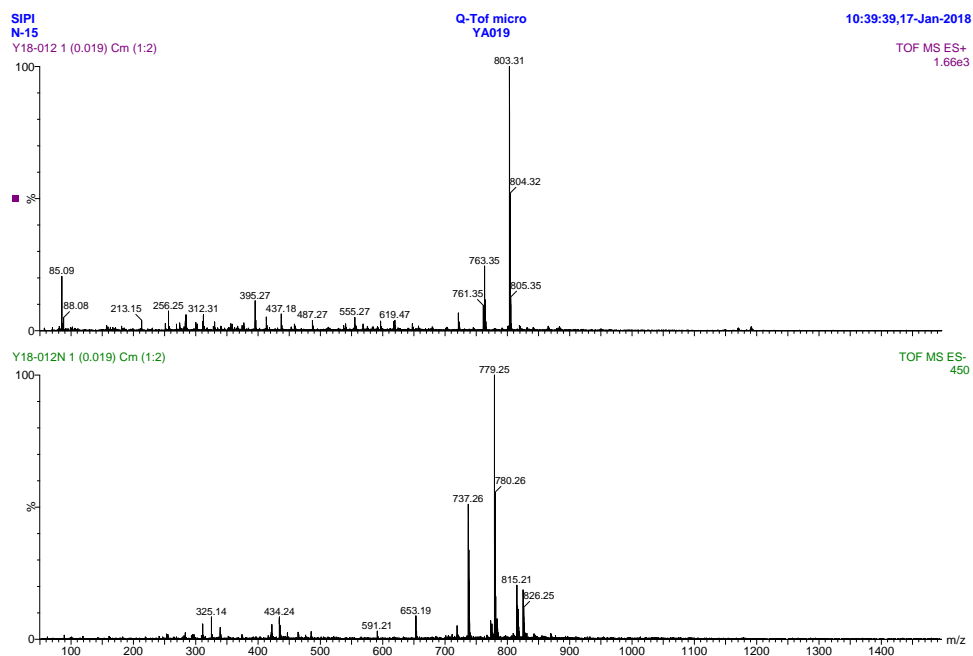

## S3. <sup>1</sup>H NMR (800 MHz, CD<sub>3</sub>OD) spectrum of compound 1

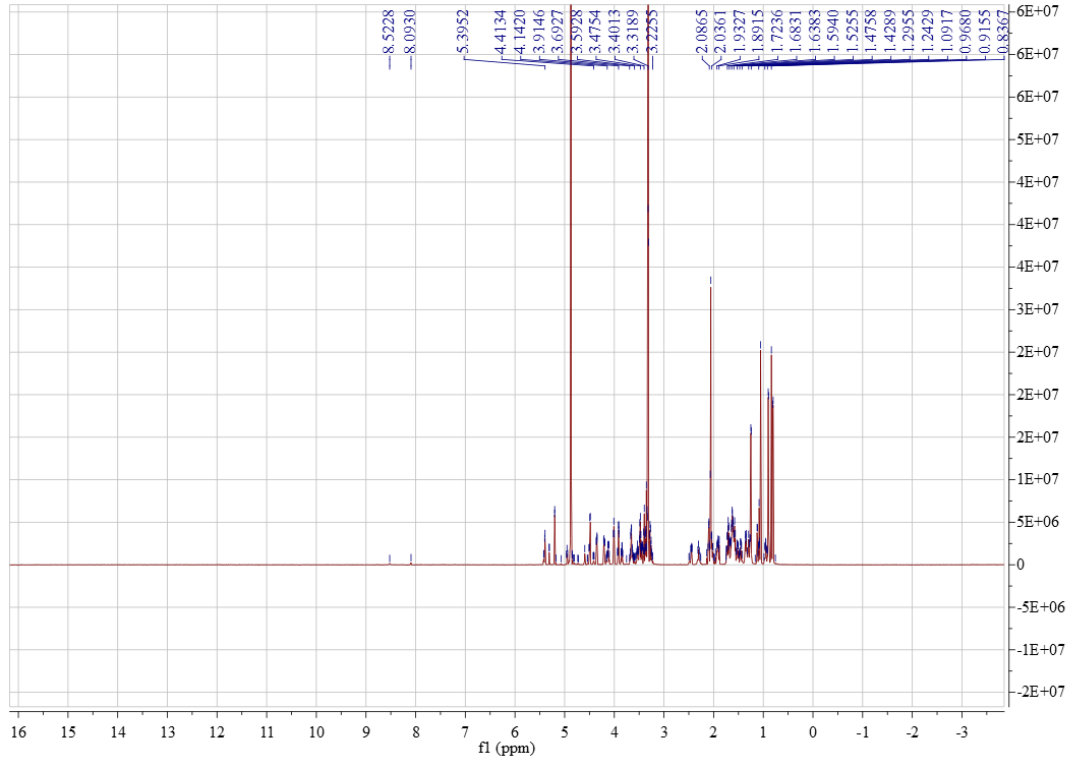

S4. <sup>13</sup>C NMR (201 MHz, CD<sub>3</sub>OD) spectrum of compound 1

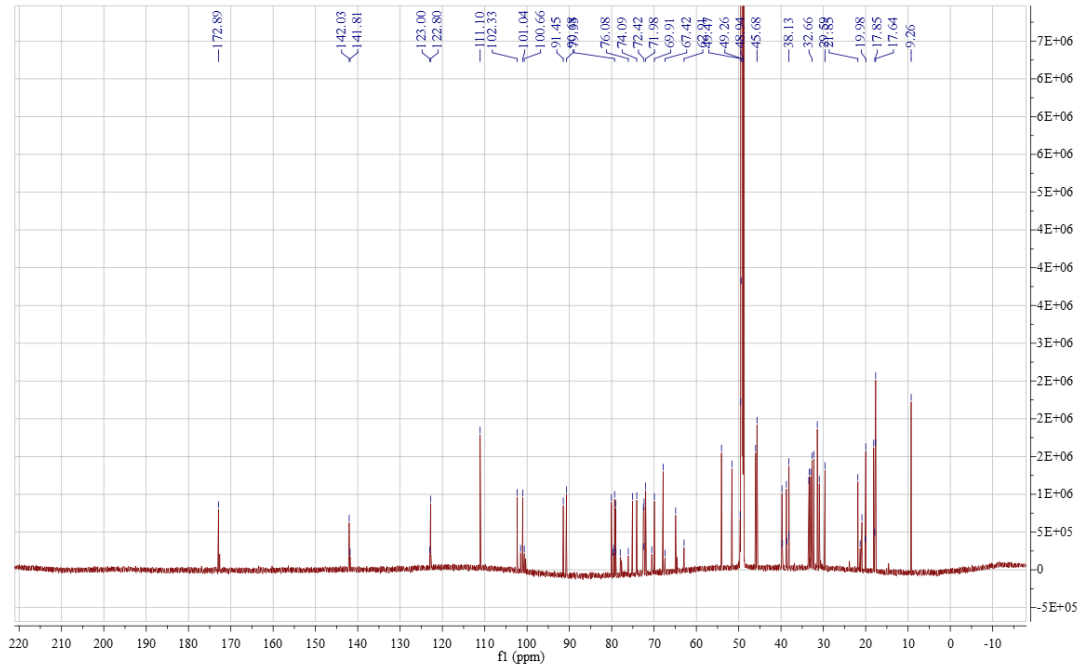

S5. DEPT 135 spectrum of compound 1

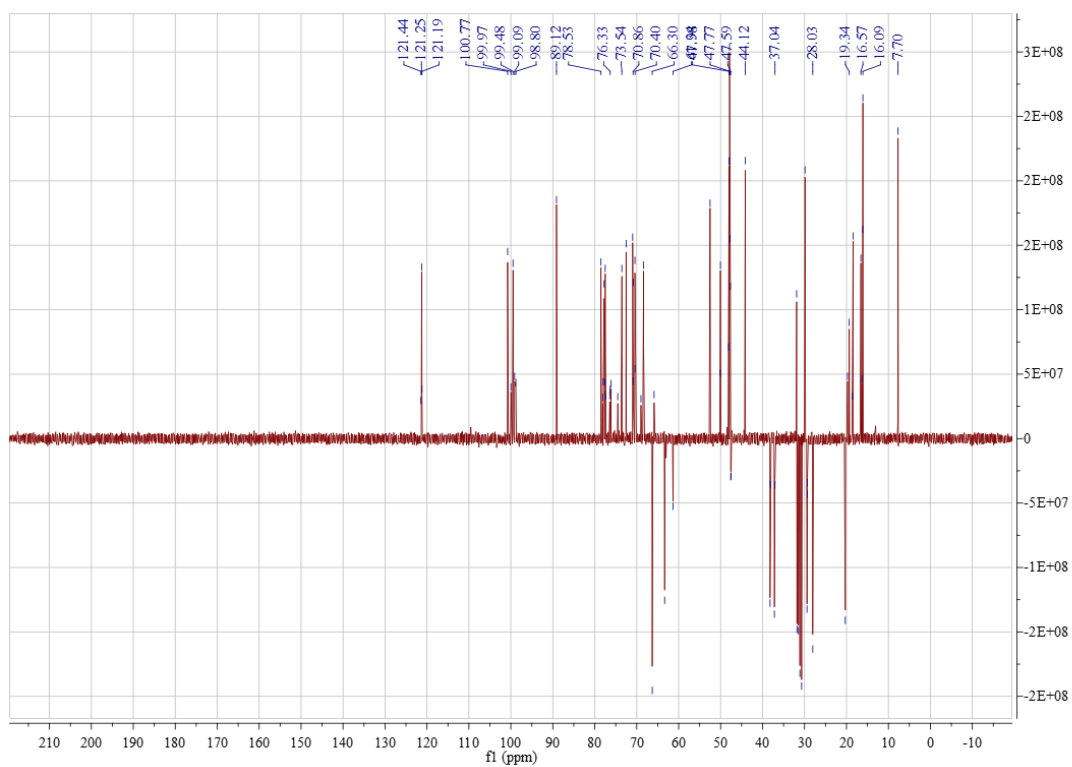

S6. HSQC spectrum of compound 1

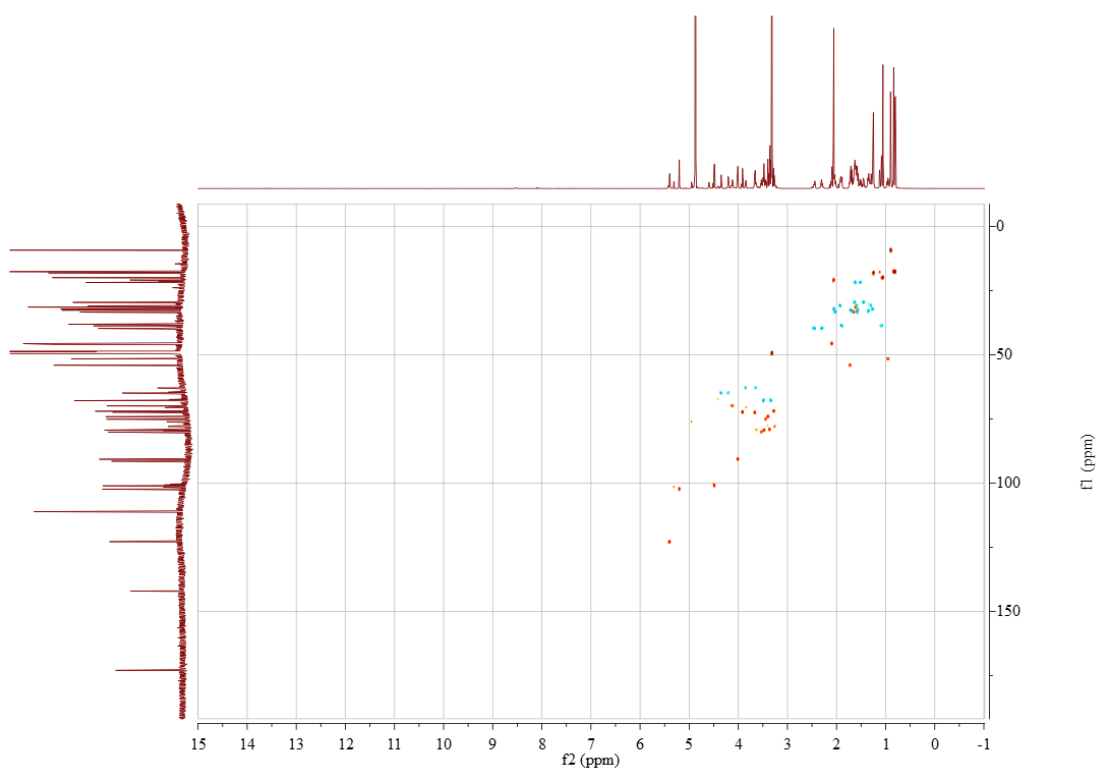

S7. HMBC spectrum of compound **1**

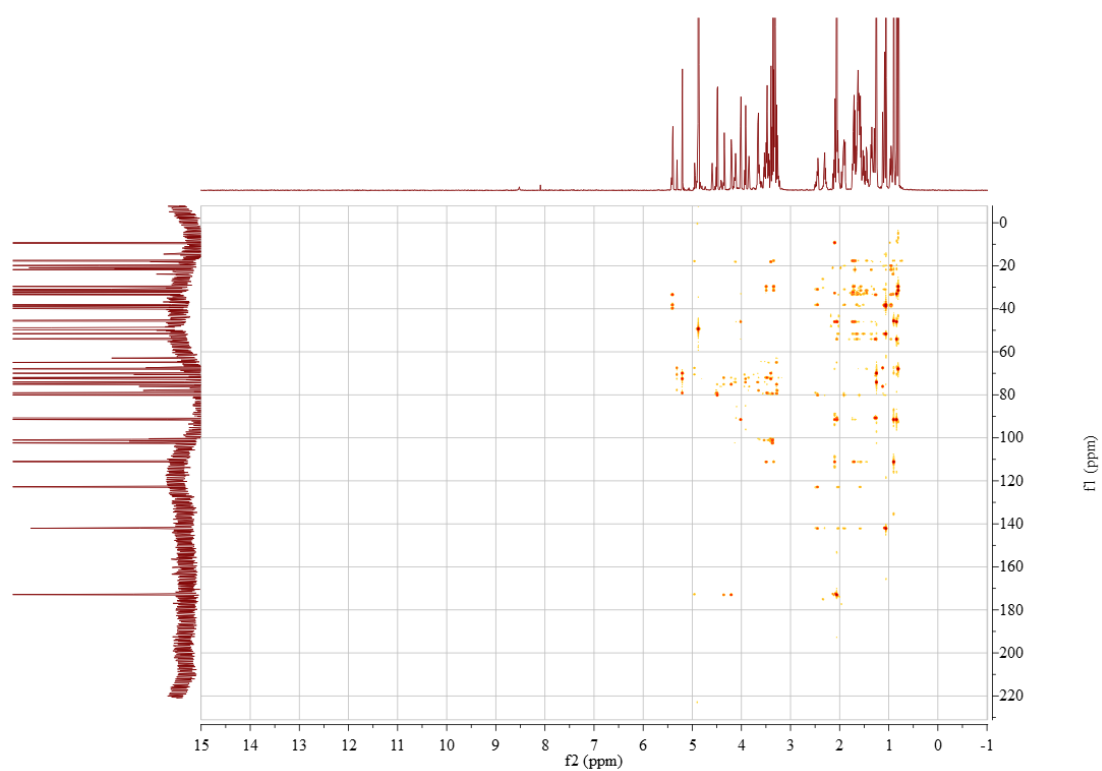

S8. <sup>1</sup>H-<sup>1</sup>H COSY spectrum of compound **1**

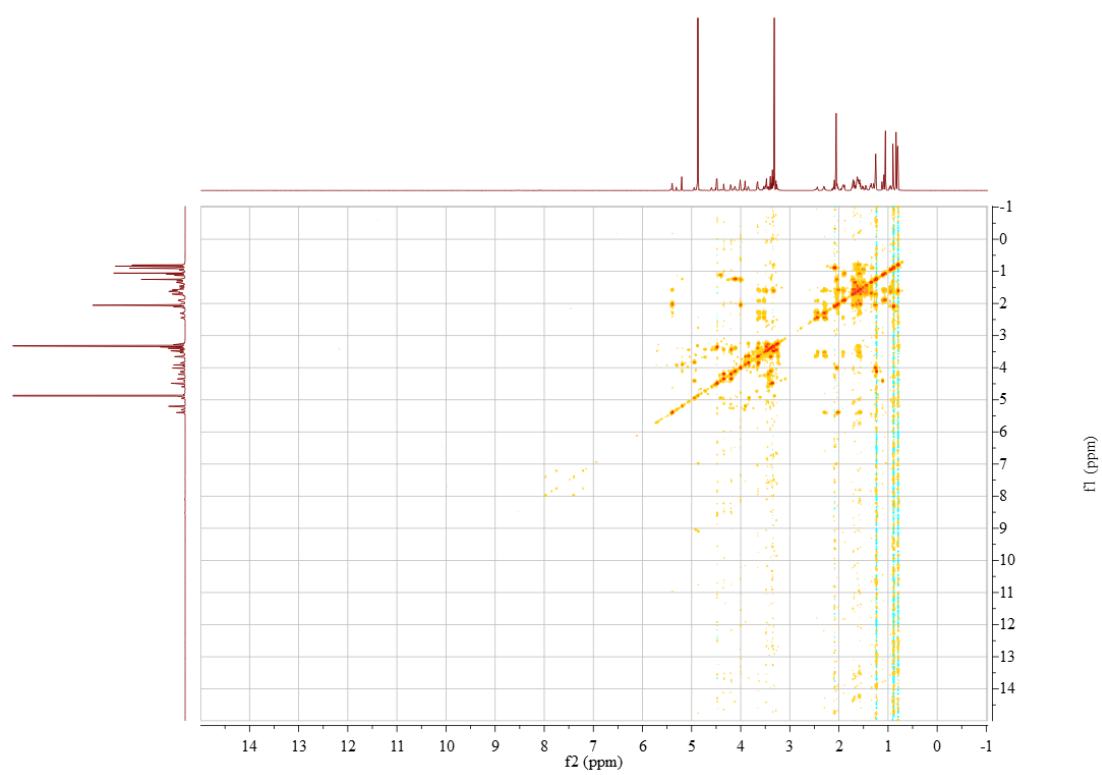

S9. NOESY spectrum of compound **1**

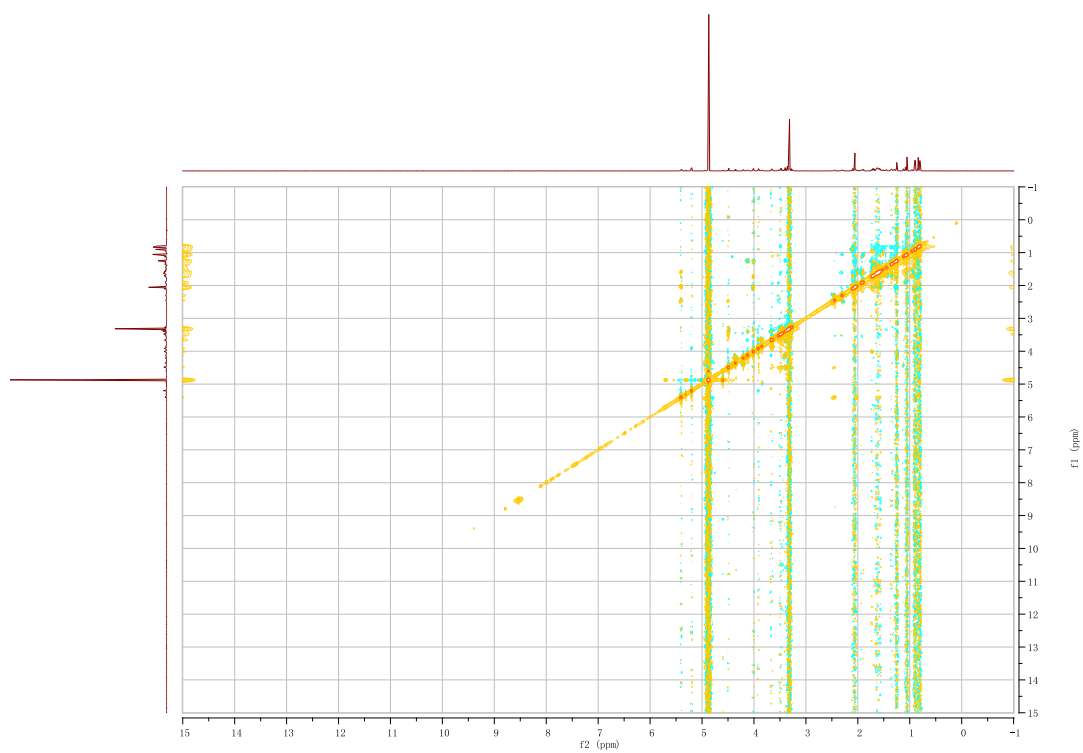

S10. TOCSY spectrum of compound **1**

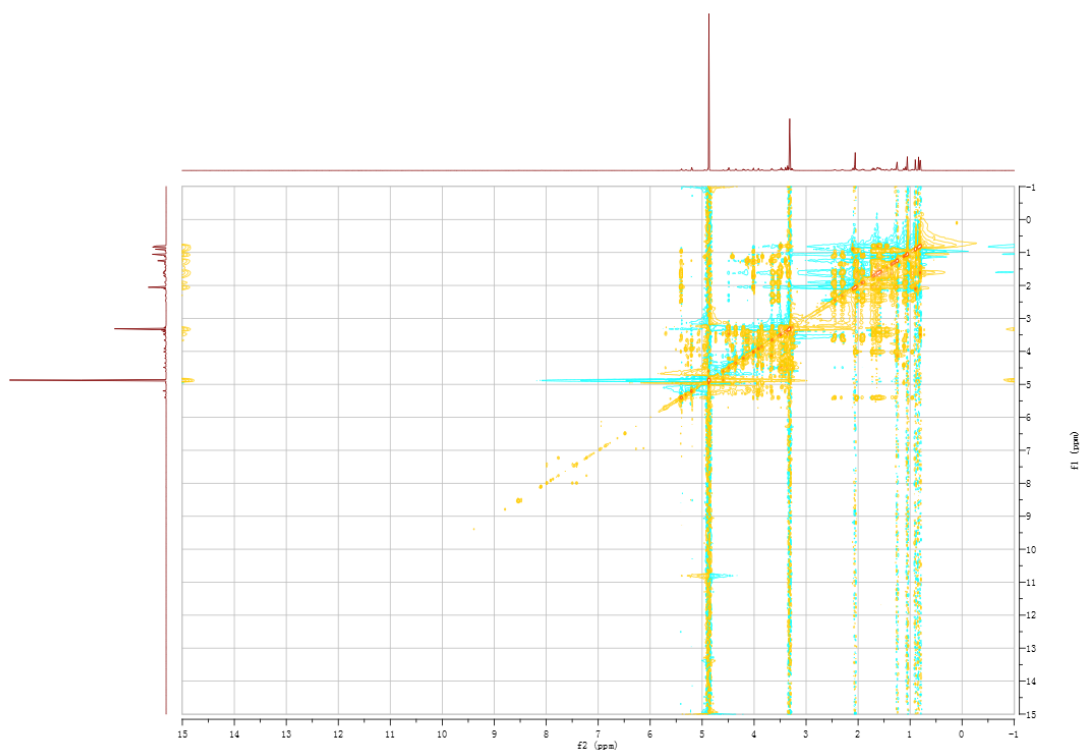



S11. Positive HR-ESI-MS spectrum of compound 2

| Mass     | Calc. Mass | mDa | PPM | DBE | i-FIT                                              |
|----------|------------|-----|-----|-----|----------------------------------------------------|
| 777.4044 | 777.4037   | 0.7 | 0.9 | 8.5 | C <sub>39</sub> H <sub>62</sub> O <sub>14</sub> Na |

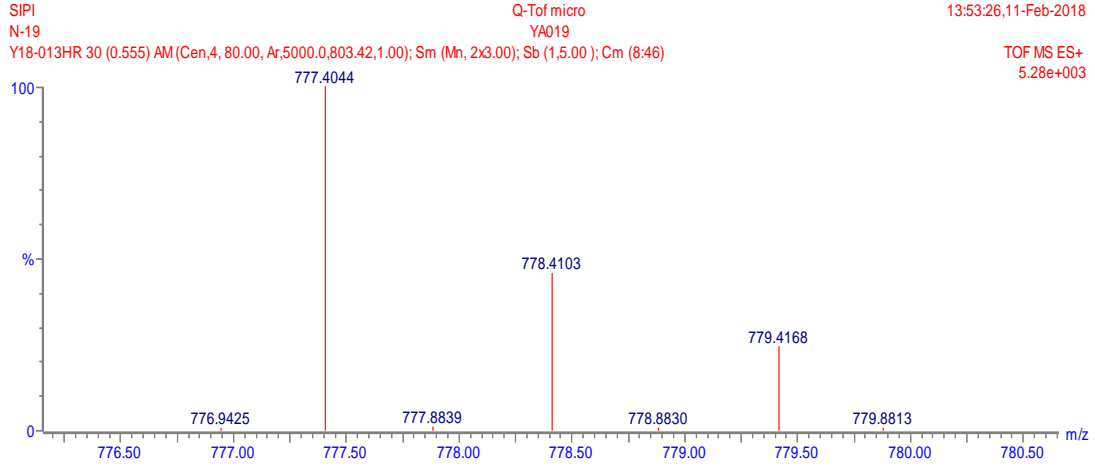

S12. Positive and Negative ESI-MS spectrum of compound 2

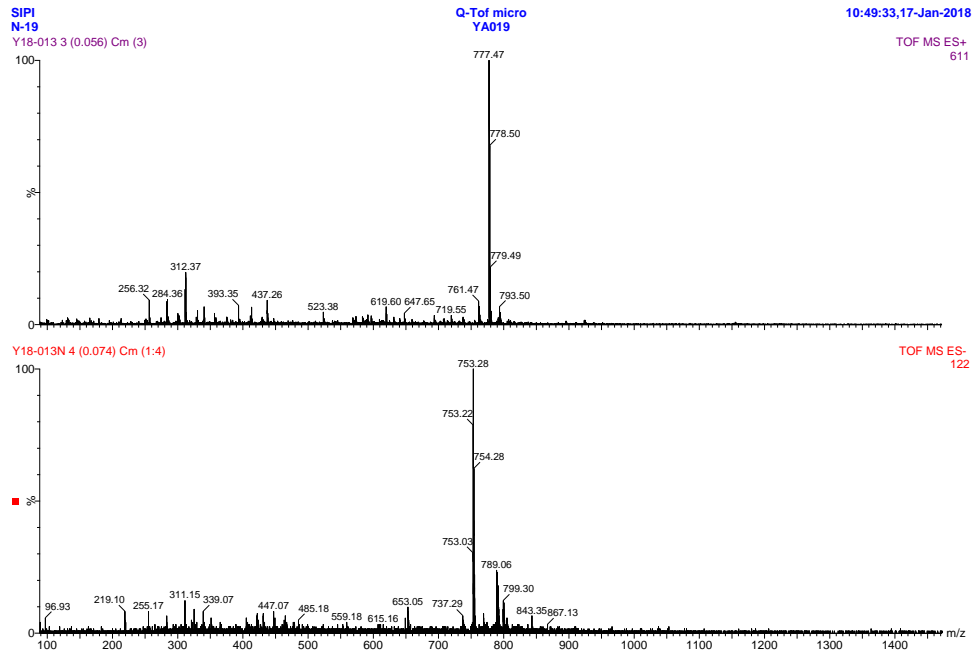

S13.  $^1\text{H}$  NMR (800 MHz,  $\text{CD}_3\text{OD}$ ) spectrum of compound 2

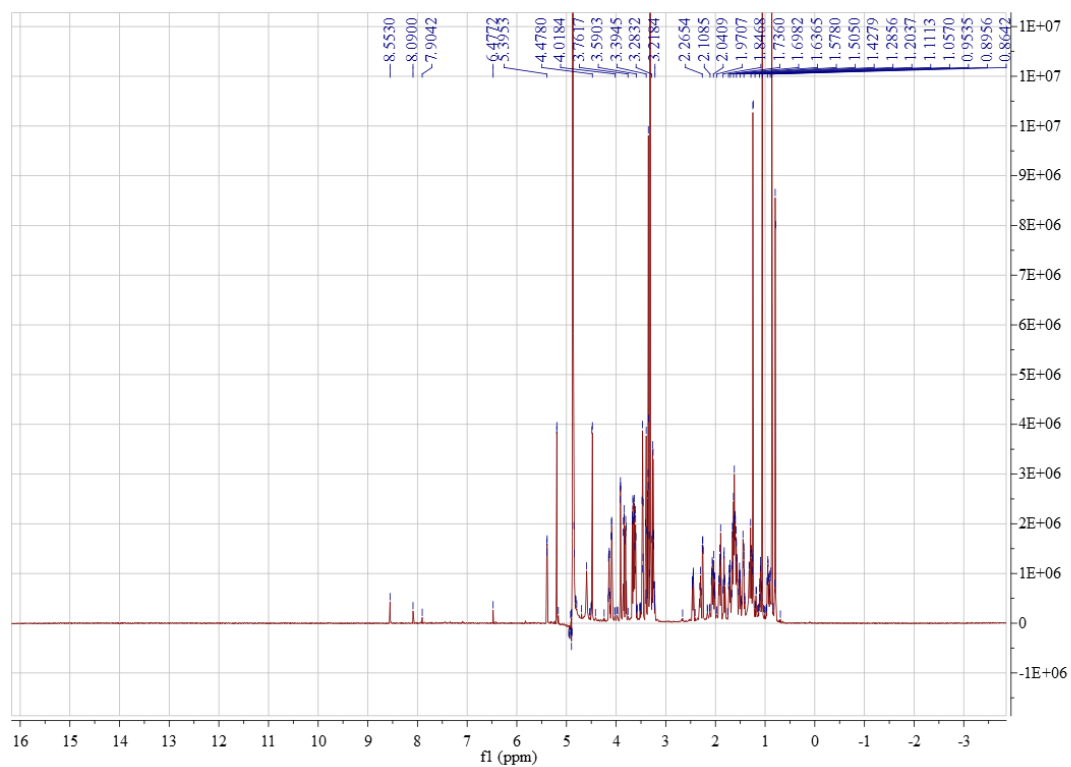

S14.  $^{13}\text{C}$  NMR (201 MHz,  $\text{CD}_3\text{OD}$ ) spectrum of compound 2

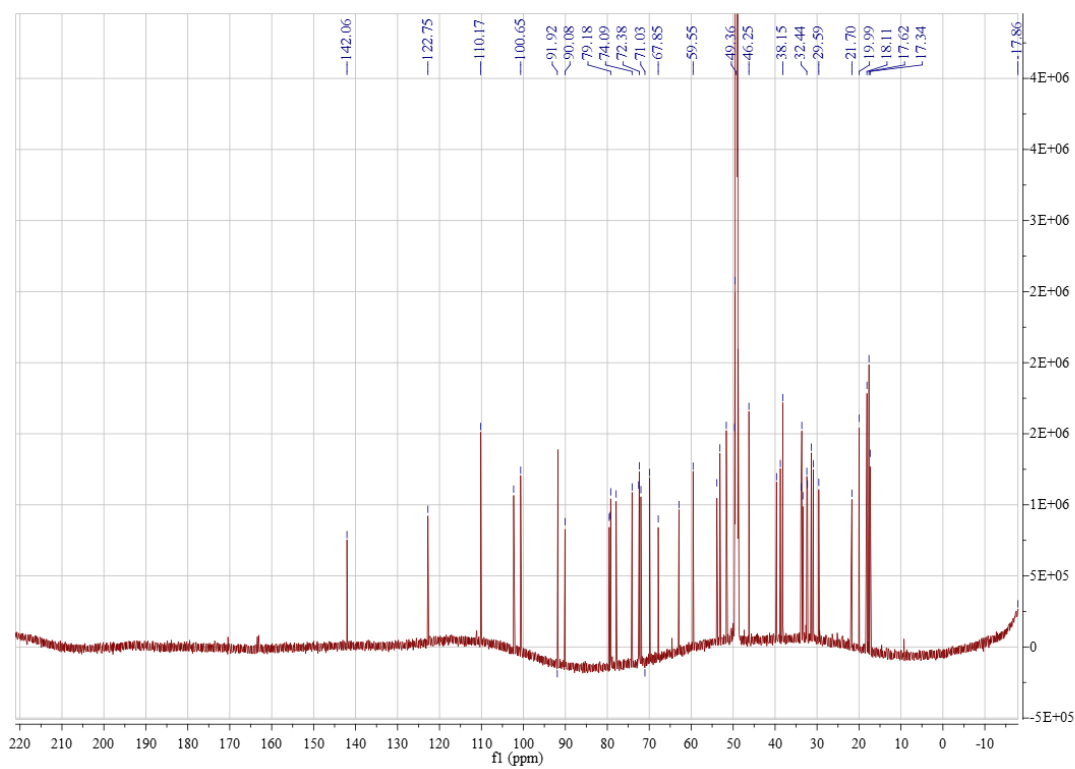

S15. DEPT 135 spectrum of compound 2

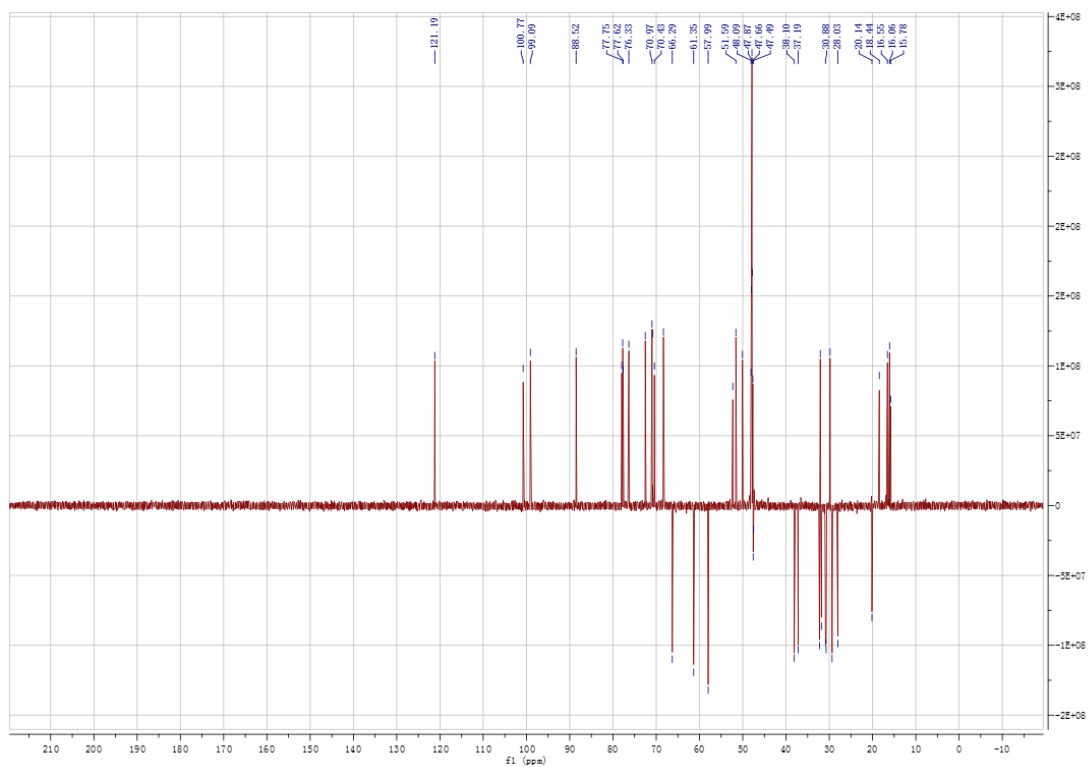

S16. HSQC spectrum of compound 2

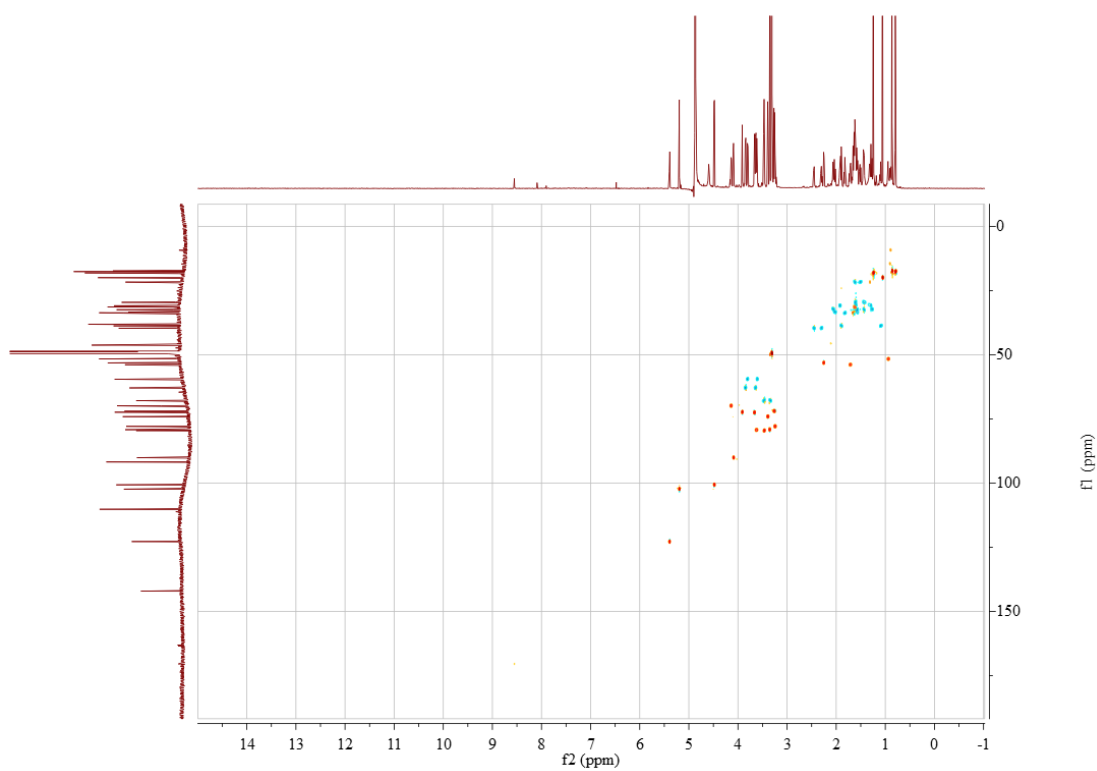

S17. HMBC spectrum of compound 2

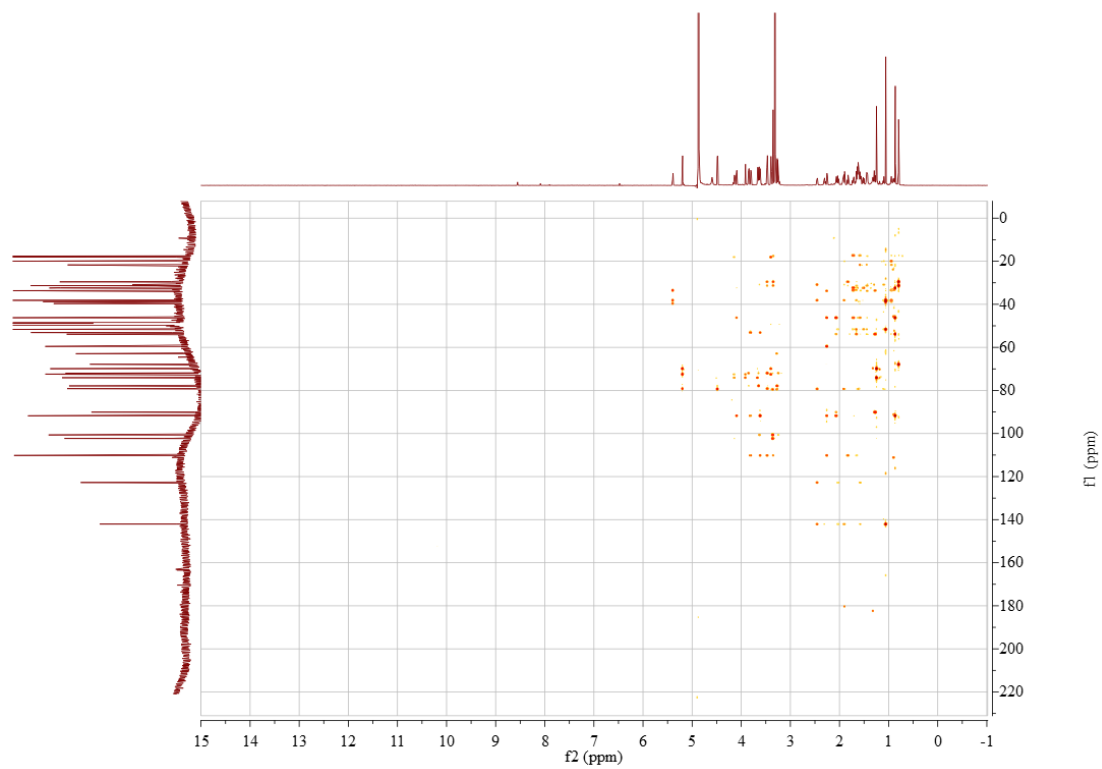

S18.  $^1\text{H}$ - $^1\text{H}$  COSY spectrum of compound 2

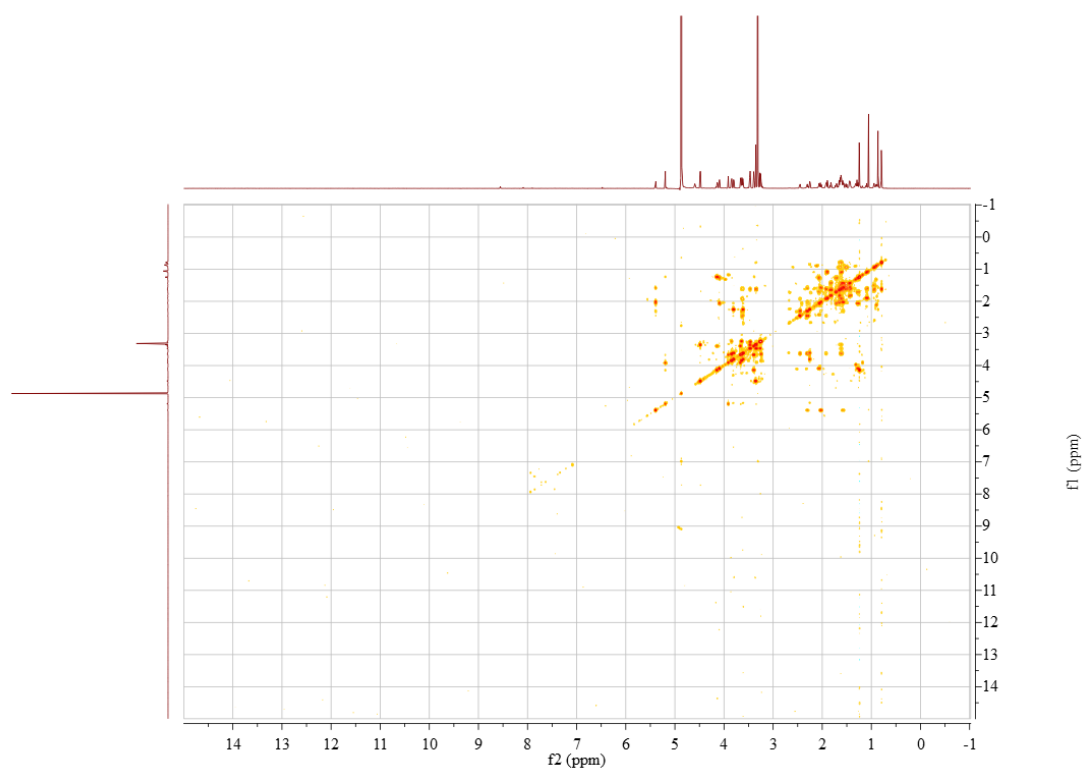

S19. NOESY spectrum of compound 2

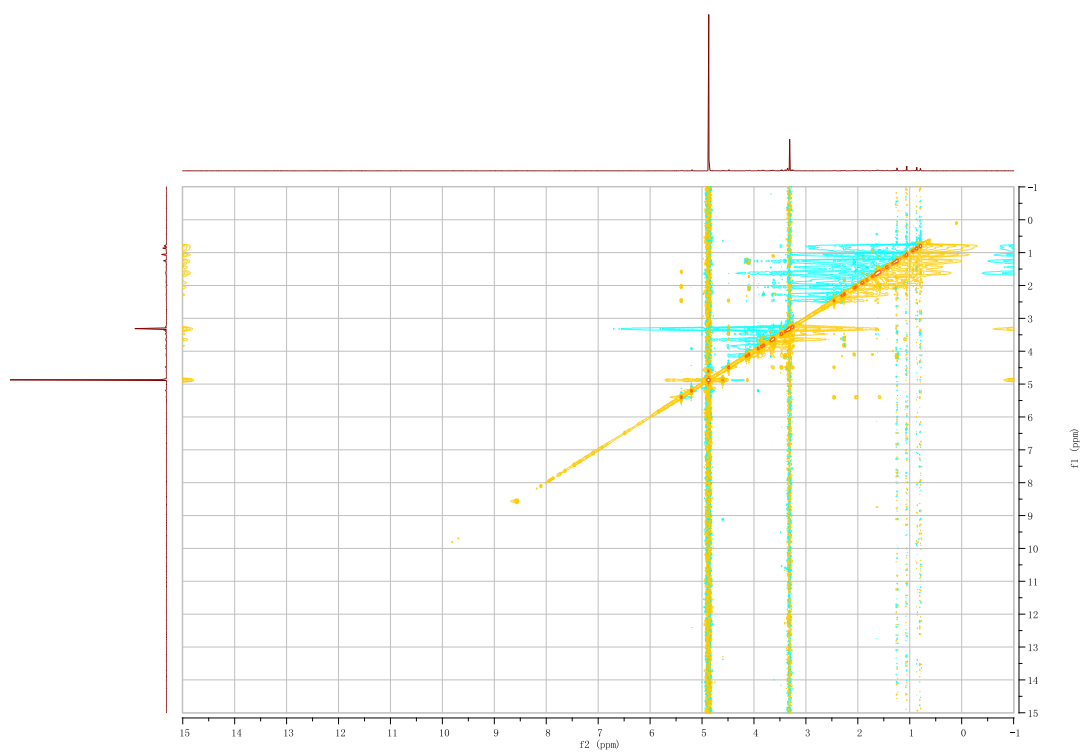

S20. TOCSY spectrum of compound 2

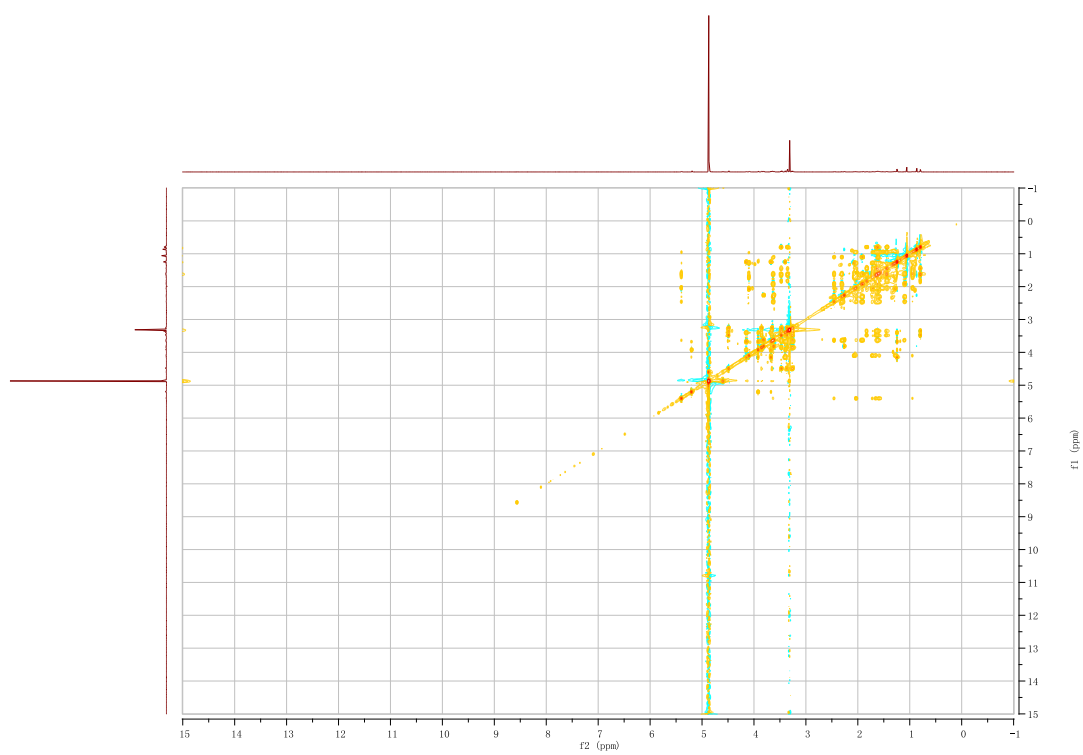

S21. Positive HR-ESI-MS spectrum of compound 3

| Mass     | Calc. Mass | mDa | PPM | DBE | i-FIT | Formula                                            |
|----------|------------|-----|-----|-----|-------|----------------------------------------------------|
| 775.3884 | 775.3881   | 0.3 | 0.4 | 9.5 | n/a   | C <sub>39</sub> H <sub>60</sub> O <sub>14</sub> Na |

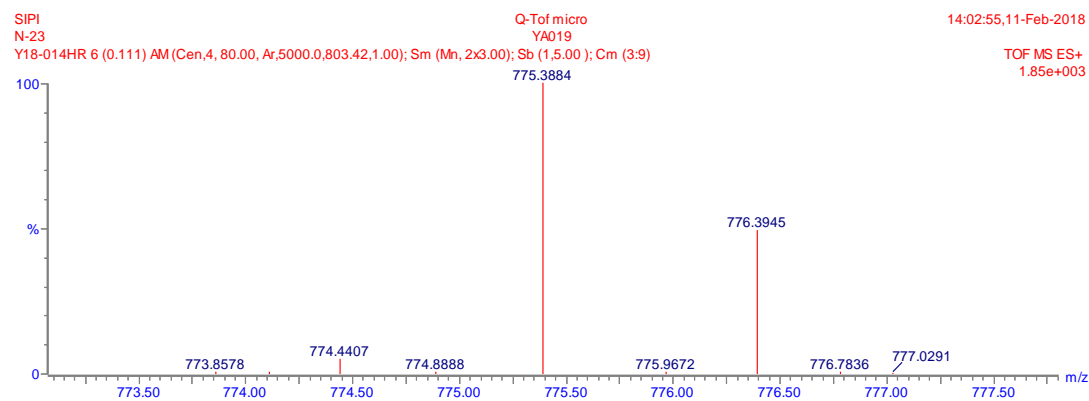

S22. Positive ESI-MS spectrum of compound 3

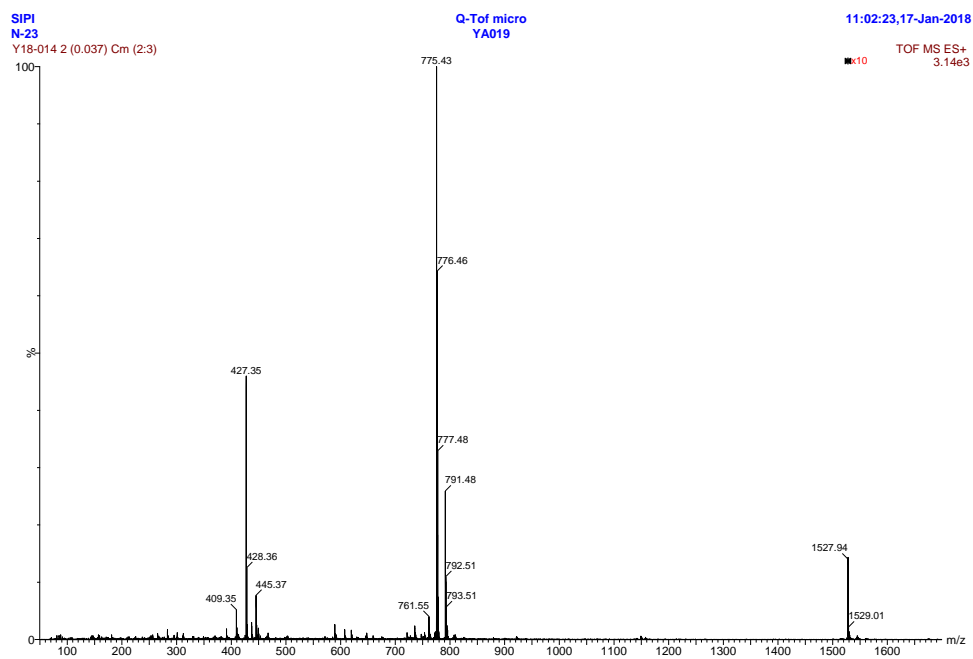

S23. <sup>1</sup>H NMR (500 MHz, CD<sub>3</sub>OD) spectrum of compound 3

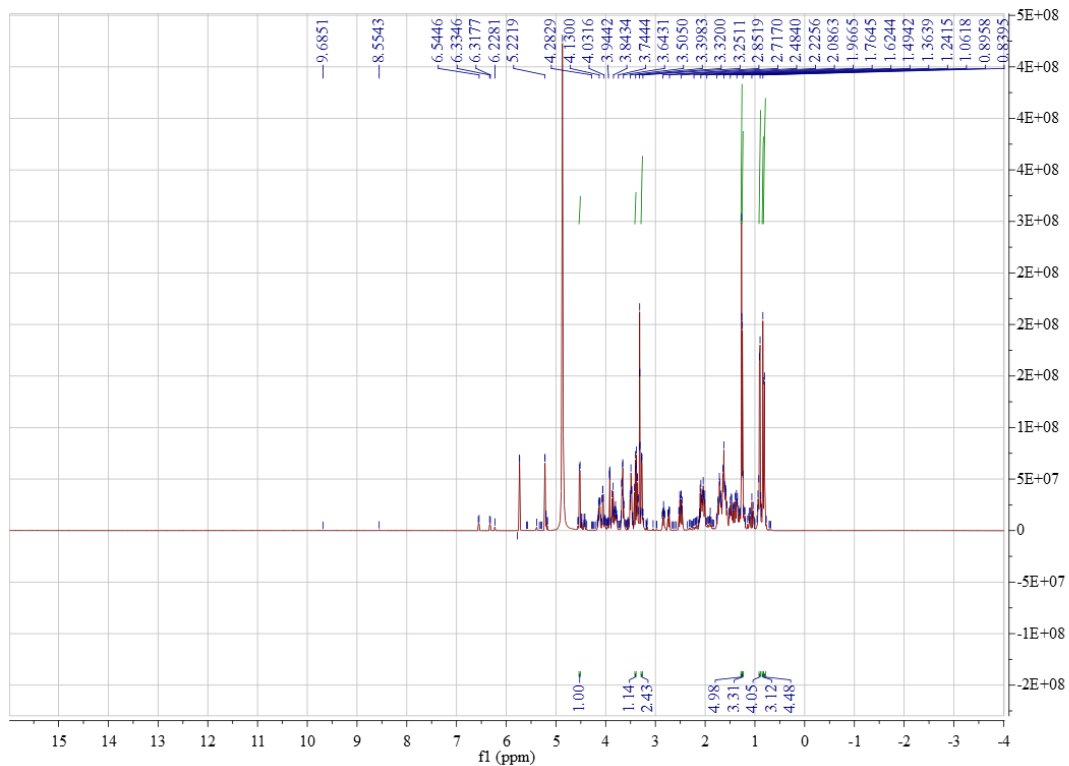

S24. <sup>13</sup>C NMR (125 MHz, CD<sub>3</sub>OD) spectrum of compound 3

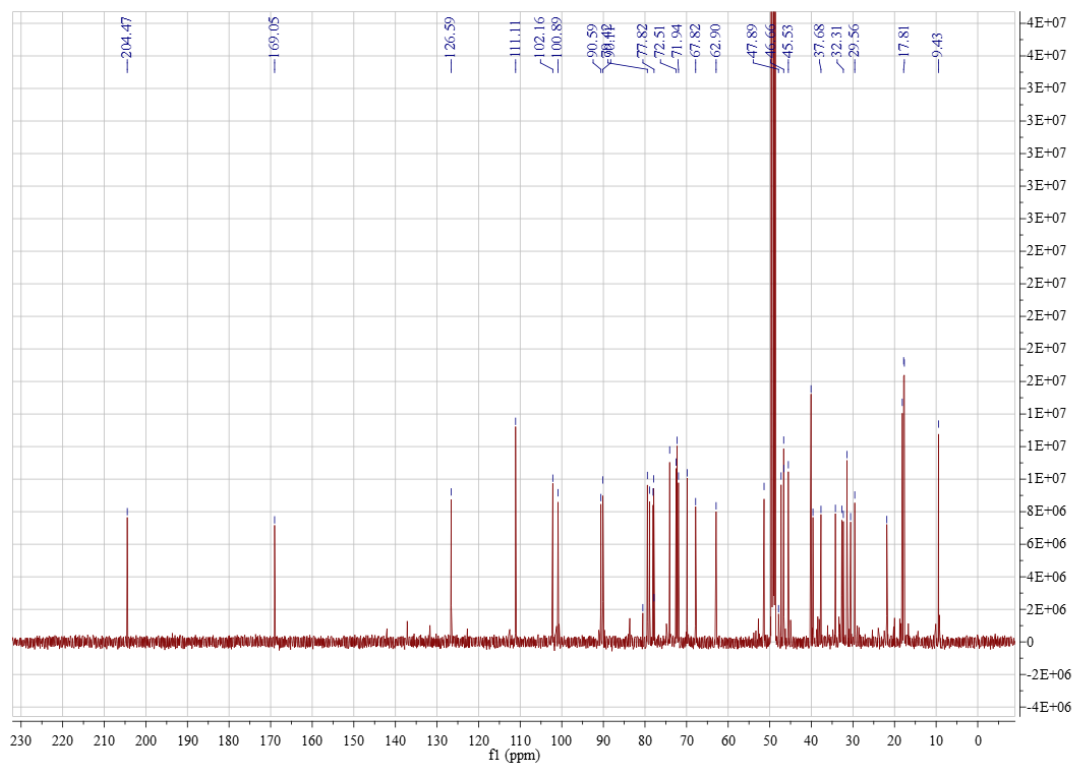

S25. DEPT 135 spectrum of compound 3

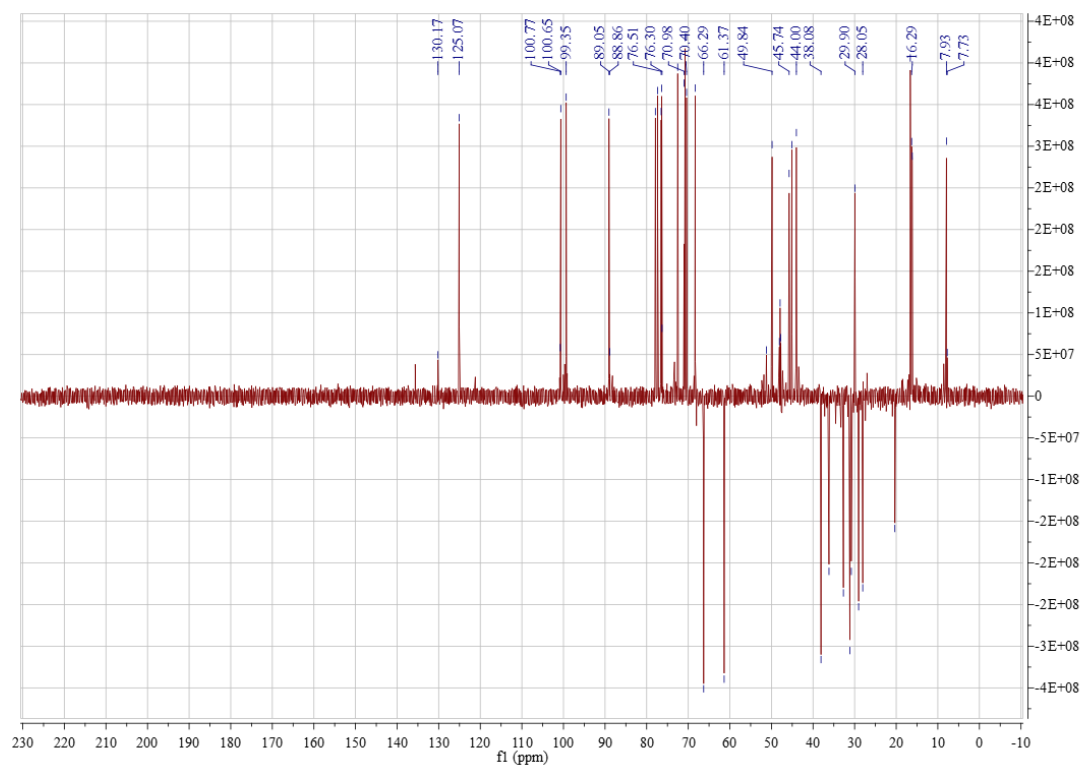

S26. HSQC spectrum of compound 3

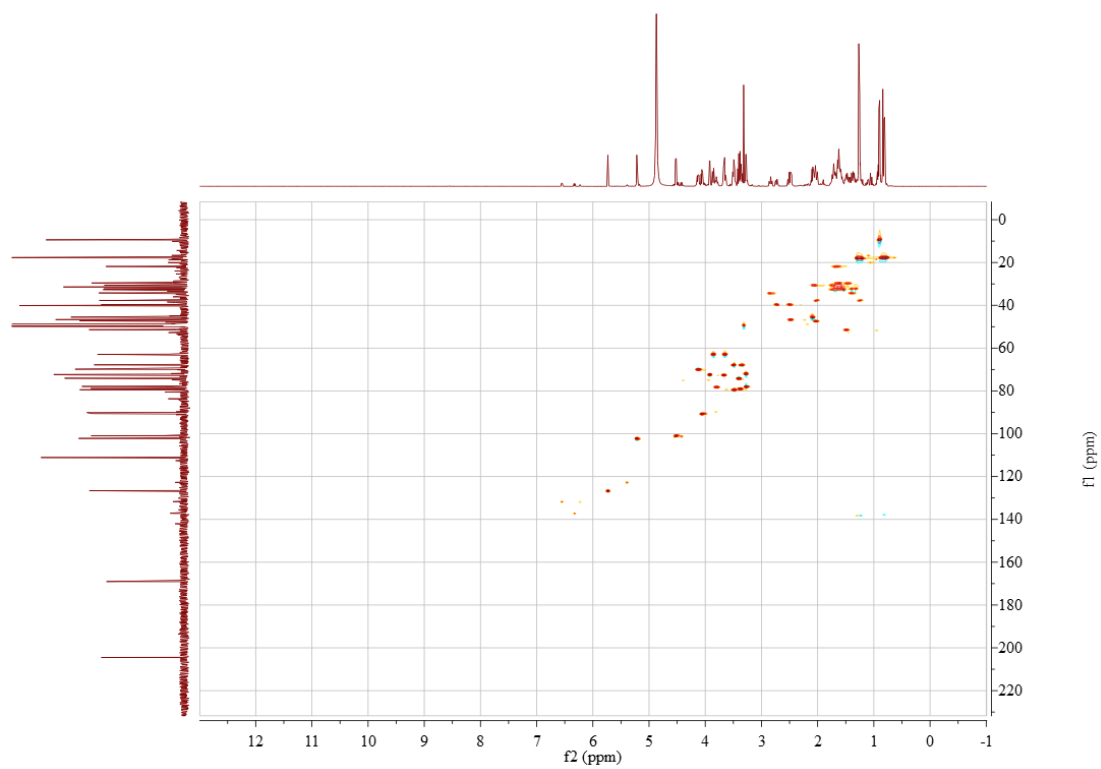

S27. HMBC spectrum of compound 3



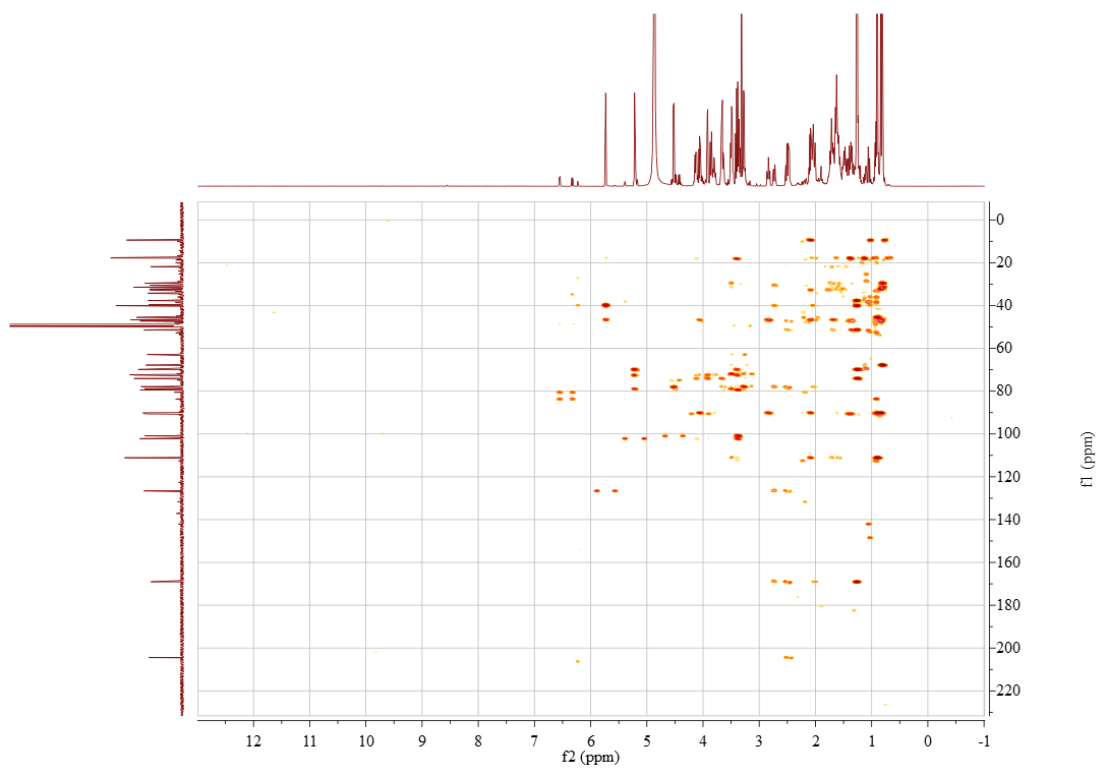

S28.  $^1\text{H}$ - $^1\text{H}$  COSY spectrum of compound 3

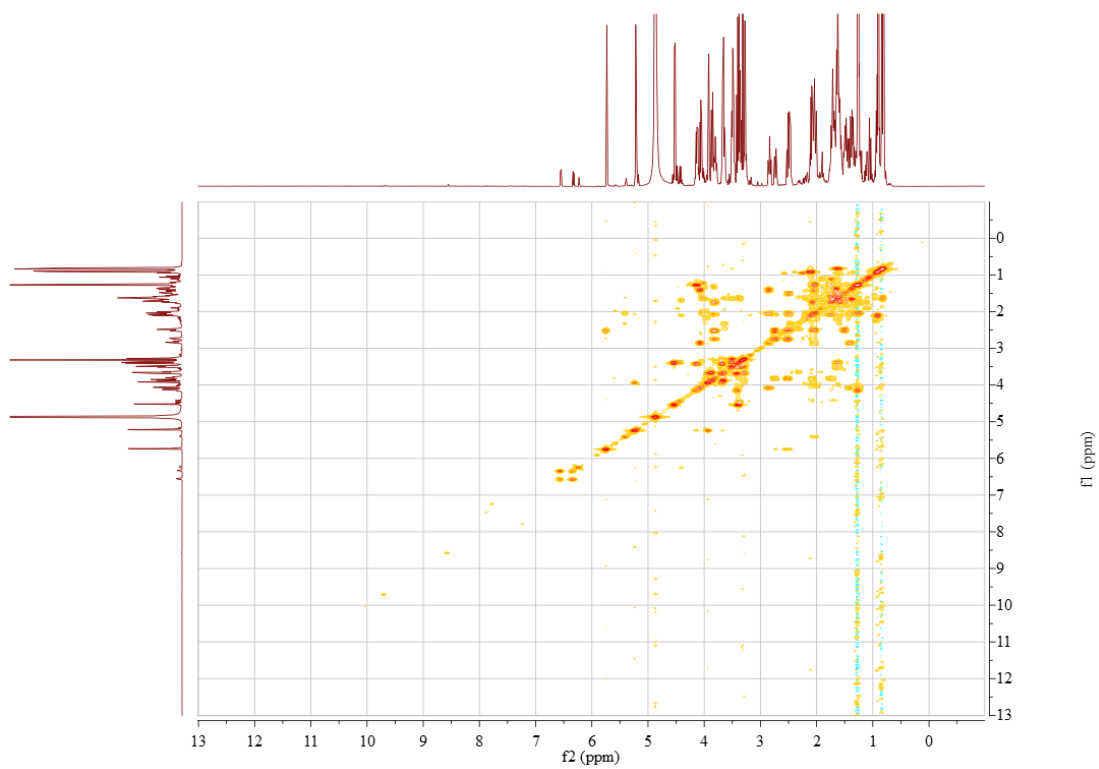

S29. NOESY spectrum of compound 3

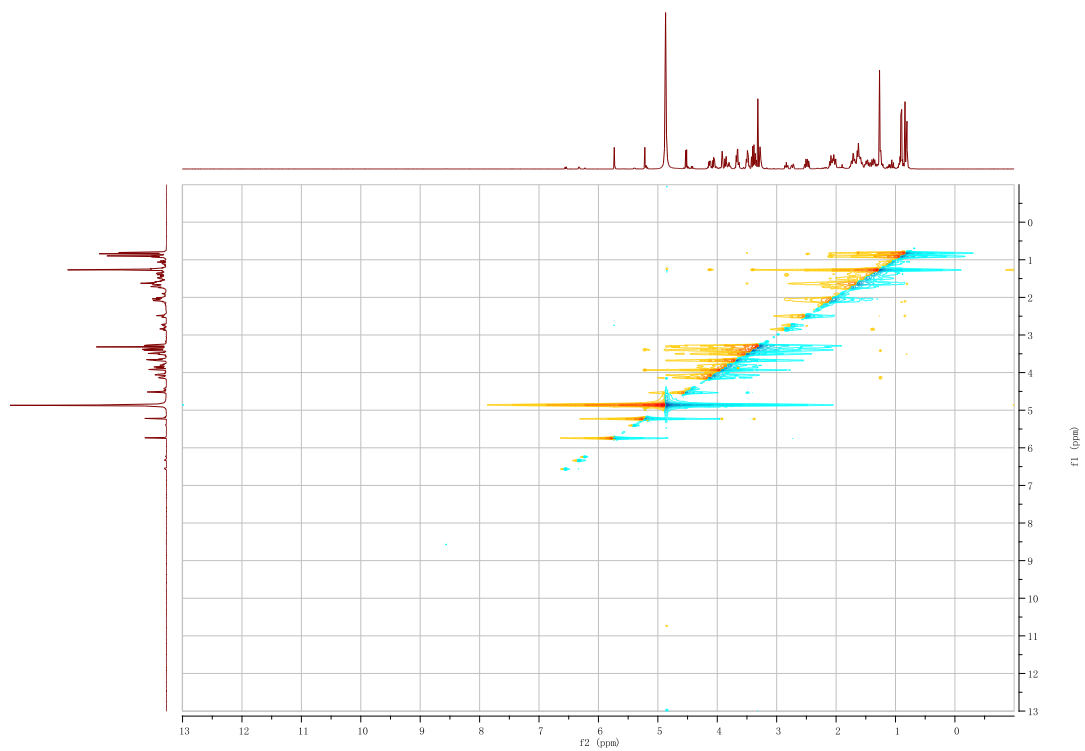

S30. TOCSY spectrum of compound 3

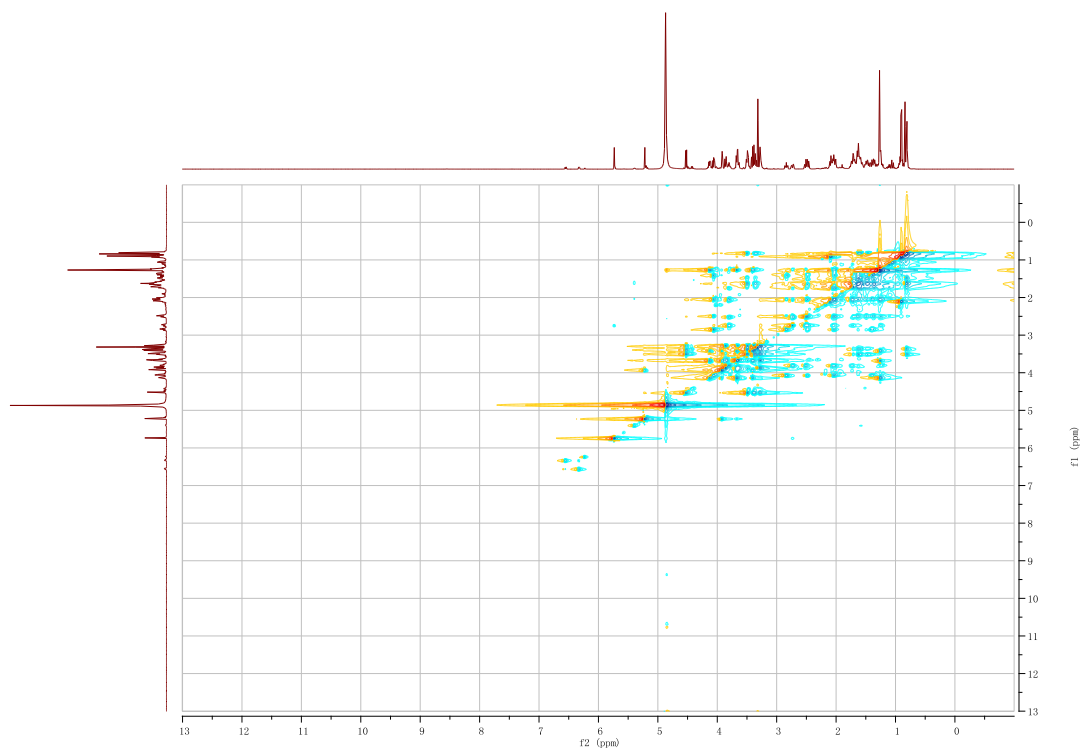

S31. Positive HR-ESI-MS spectrum of compound 4

| Mass     | Calc. Mass | mDa  | PPM  | DBE | i-FIT | Formula                                            |
|----------|------------|------|------|-----|-------|----------------------------------------------------|
| 775.3849 | 775.3881   | -3.2 | -4.1 | 9.5 | 36.7  | C <sub>39</sub> H <sub>60</sub> O <sub>14</sub> Na |

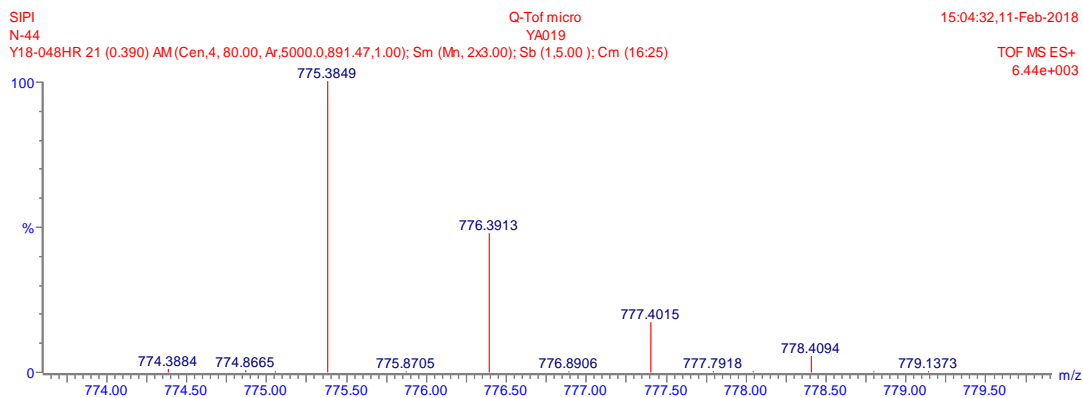

S32. <sup>1</sup>H NMR (500 MHz, CD<sub>3</sub>OD) spectrum of compound 4

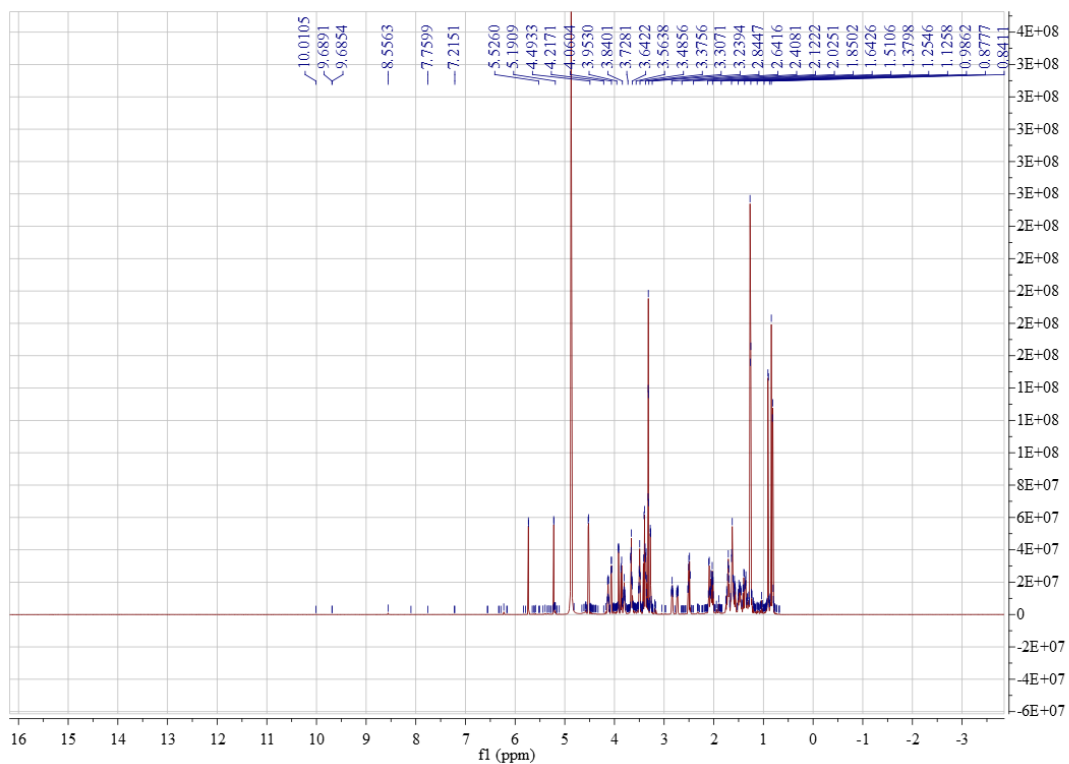

S33. <sup>13</sup>C NMR (125 MHz, CD<sub>3</sub>OD) spectrum of compound 4

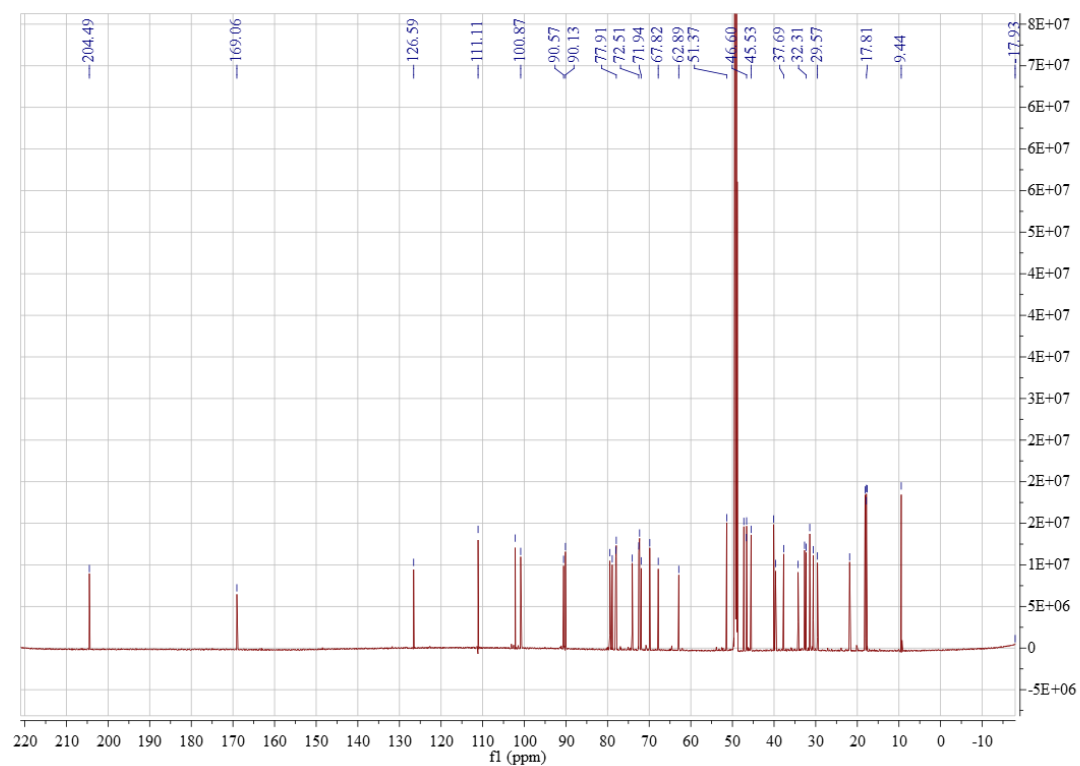

S34. DEPT 135 spectrum of compound 4

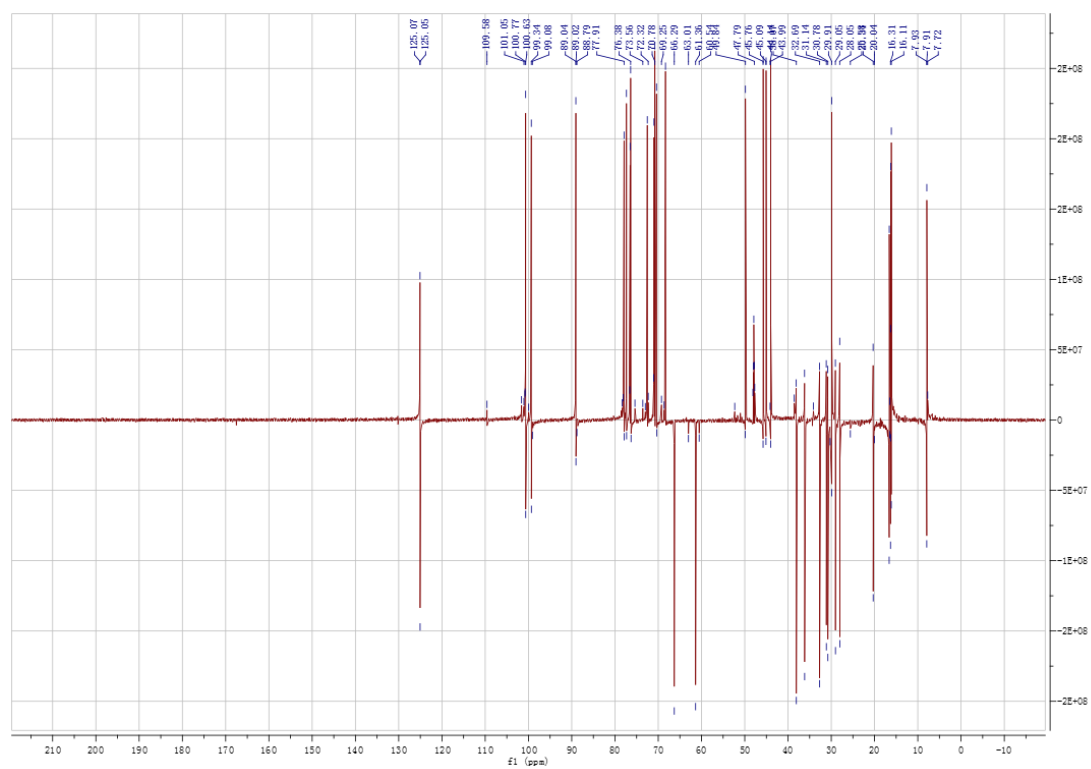

S35. HSQC spectrum of compound 4

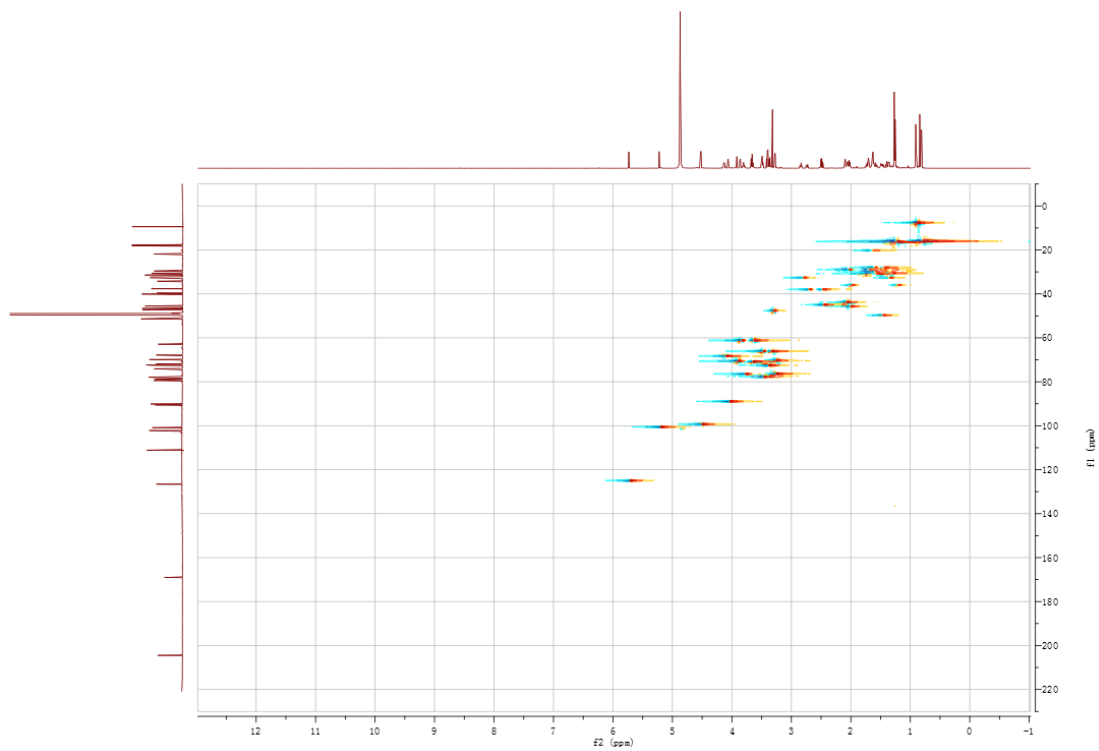

S36. HMBC spectrum of compound 4

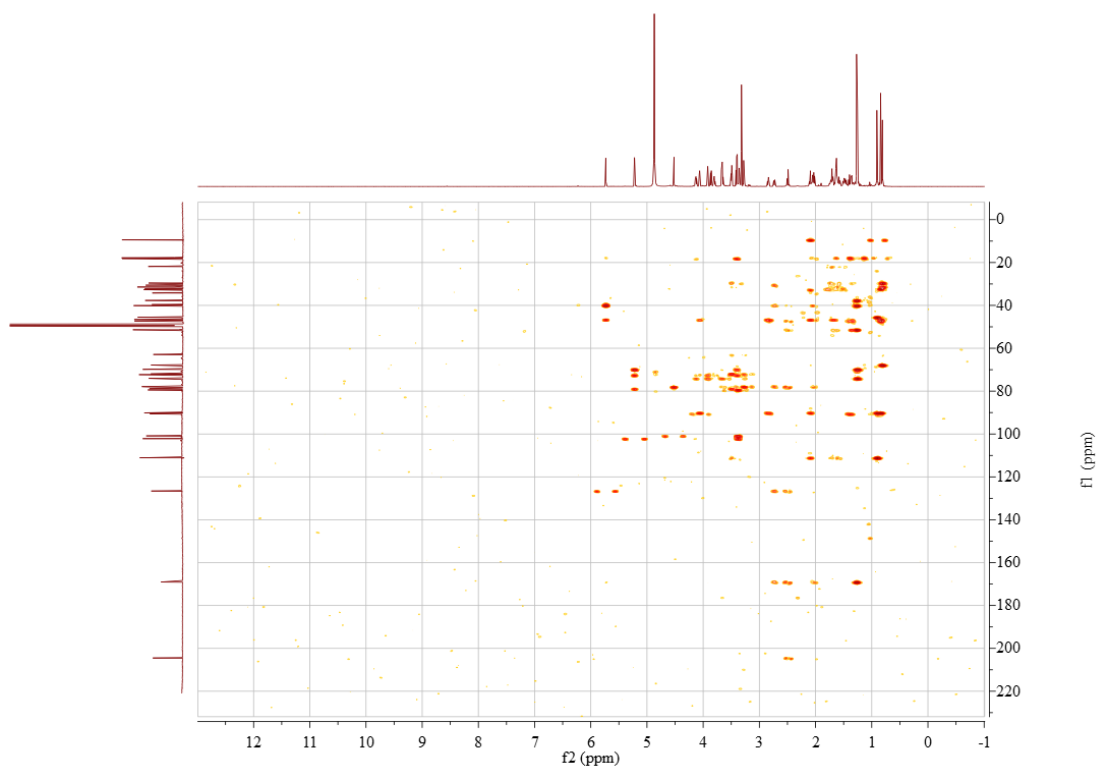

S37. <sup>1</sup>H-<sup>1</sup>H COSY spectrum of compound 4

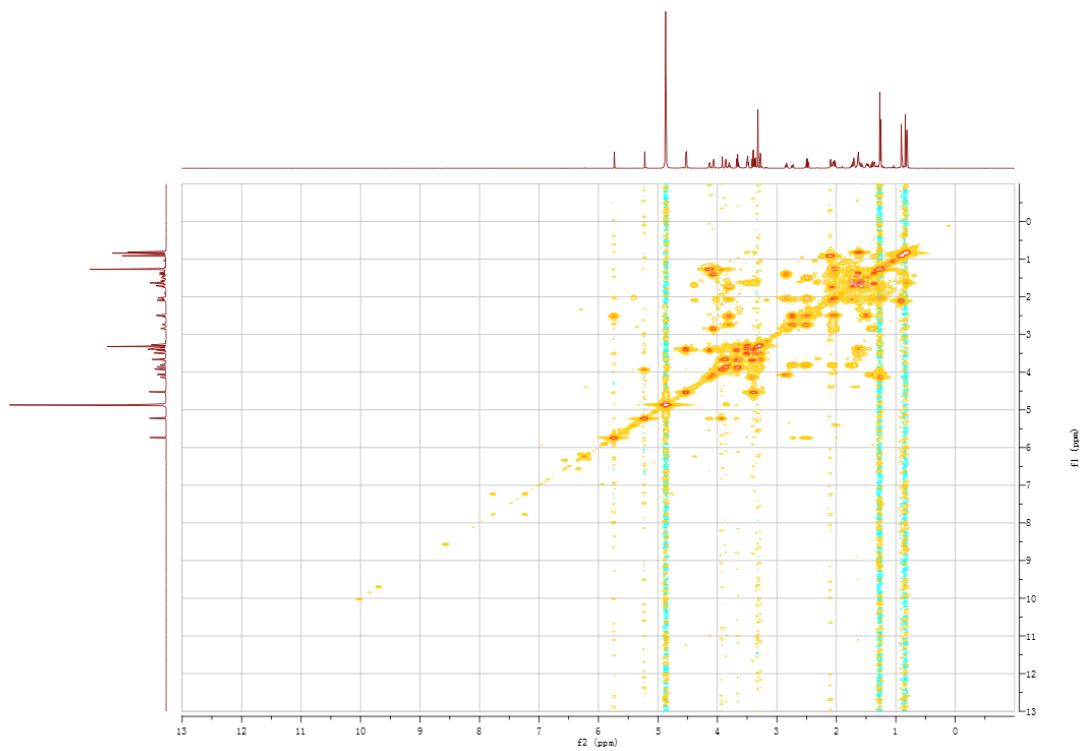

S38. NOESY spectrum of compound 4

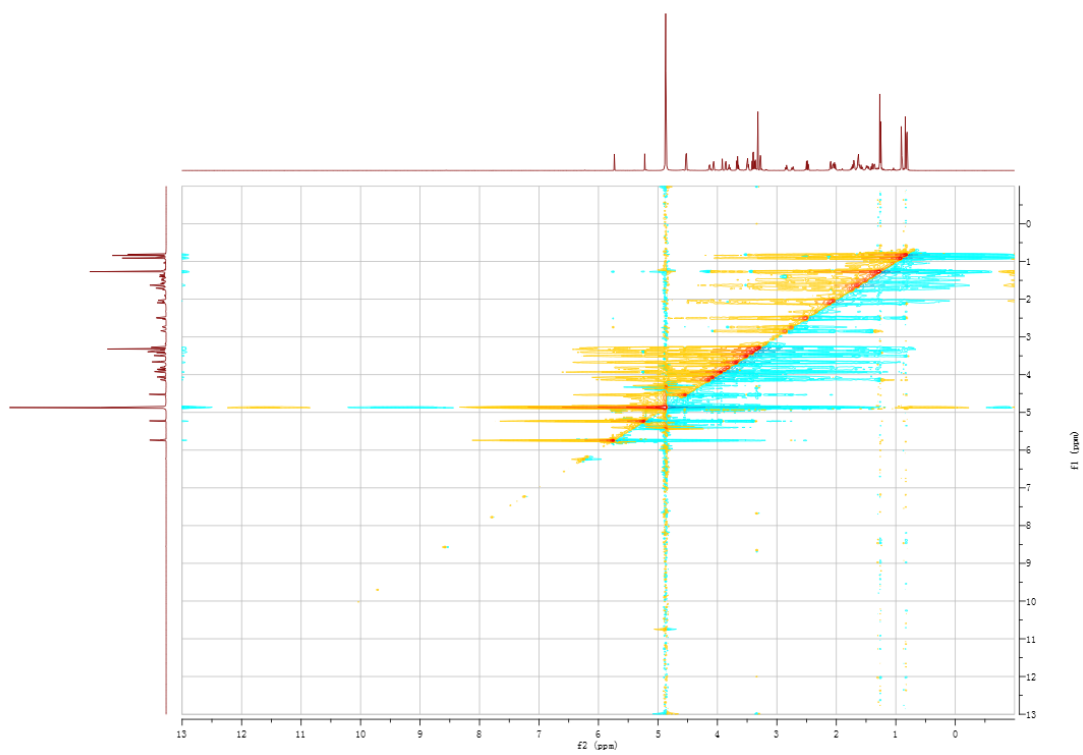

S39. TOCSY spectrum of compound 4

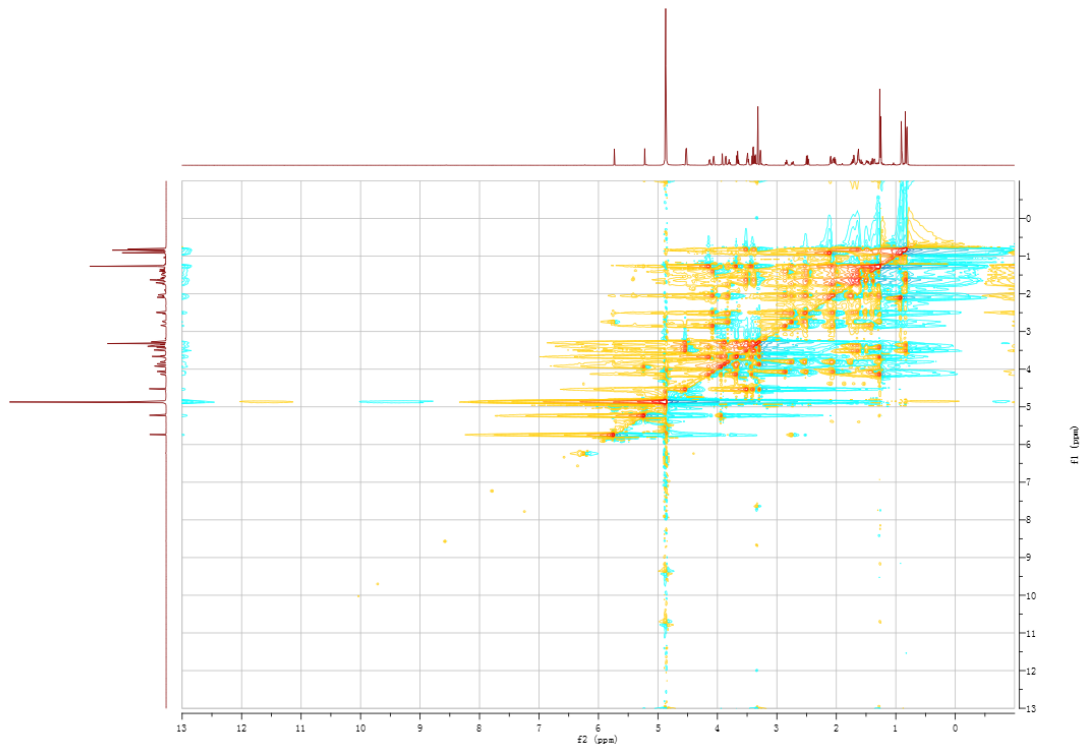

Supplement: molecules-23-00588-s001.pdf [file molecules-23-00588-s001.pdf]
